# A disease-associated gene desert orchestrates macrophage inflammatory responses via ETS2

## Authors:

Stankey CT<sup>1,2\*</sup>, Bourges C<sup>1\*</sup>, Turner-Stokes T<sup>1,2</sup>, Piedade AP<sup>1</sup>, Palmer-Jones C<sup>3</sup>, Papa I<sup>1</sup>, Dos Silva dos Santos M<sup>4</sup>, Randzavola LO<sup>2</sup>, Speidel L<sup>5,6</sup>, Parkes EC<sup>1</sup>, Edwards W<sup>7</sup>, Rochford AP<sup>3</sup>, Murray CD<sup>3</sup>, MacRae JI<sup>4</sup>, Skoglund P<sup>5</sup>, Wallace C<sup>7,9</sup>, Cader MZ<sup>7,8</sup>, Thomas DC<sup>2</sup>, Lee JC<sup>1,3</sup>.

## Affiliations:

<sup>1</sup> Genetic Mechanisms of Disease Laboratory, The Francis Crick Institute, London, UK

<sup>2</sup> Department of Immunology and Inflammation, Imperial College London, UK

<sup>3</sup> Department of Gastroenterology, UCL Institute of Liver and Digestive Diseases, Royal Free Hospital, Pond St, London, UK

<sup>4</sup> Metabolomics STP, The Francis Crick Institute, London, UK

<sup>5</sup> Ancient Genomics Laboratory, The Francis Crick Institute, London, UK

<sup>6</sup> Genetics Institute, University College London, UK

<sup>7</sup> Cambridge Institute of Therapeutic Immunology and Infectious Disease, Jeffrey Cheah Biomedical Centre, University of Cambridge, Cambridge, UK

<sup>8</sup> Department of Medicine, University of Cambridge, Addenbrooke's Hospital, Cambridge, UK

<sup>9</sup> MRC Biostatistics Unit, Cambridge Institute of Public Health, Cambridge, UK

\* These authors contributed equally to this work

**Correspondence:** james.lee@crick.ac.uk

## Abstract

Increasing global rates of autoimmune and inflammatory disease present a burgeoning threat to human health<sup>1</sup>. This is compounded by the limited efficacy of available treatments<sup>1</sup> and high failure rates during drug development<sup>2</sup> – underscoring an urgent need to better understand disease mechanisms. Here we show how genetics could address this challenge. By investigating an intergenic haplotype on chr21q22, independently linked to inflammatory bowel disease (IBD), ankylosing spondylitis, primary sclerosing cholangitis and Takayasu’s arteritis<sup>3-6</sup>, we discover that the causal gene, *ETS2*, is a master regulator of inflammatory responses in human macrophages and delineate how the risk haplotype increases *ETS2* expression. Genes regulated by *ETS2* were prominently expressed in affected tissues from chr21q22-associated diseases and more enriched for IBD GWAS hits than almost all previously described pathways. Overexpressing *ETS2* in resting macrophages produced an activated effector state that phenocopied intestinal macrophages from IBD<sup>7</sup>, with upregulation of multiple drug targets including TNF $\alpha$  and IL-23. Using a database of cellular signatures<sup>8</sup>, we identify drugs that could modulate this pathway and validate the potent anti-inflammatory activity of one class of small molecules *in vitro* and *ex vivo*. Together, this highlights the potential for common genetic associations to improve both the understanding and treatment of human disease.

Currently, nearly 5% of the world's population are affected by at least one autoimmune or inflammatory disease. These heterogeneous conditions, which range from Crohn's disease and ulcerative colitis (collectively IBD) to psoriasis and rheumatoid arthritis, share a common need for better treatments, but only ~10% of drugs entering clinical development ever become approved therapies<sup>2</sup>. This high failure rate is principally due to a lack of efficacy<sup>9</sup> or – put another way – because the pathways being targeted are less important than they were assumed to be. Genetics provides a unique opportunity to elucidate disease mechanisms, with hundreds of regions of the human genome now directly linked to the pathogenesis of one or more autoimmune or inflammatory disease<sup>10</sup>. Indeed, drugs that target pathways implicated by genetics have a substantially higher chance of becoming approved therapies<sup>11</sup>.

To fully realise the potential of genetics, however, knowledge of where risk variants lie must first be translated into an understanding of how they contribute to disease<sup>10</sup>. This is a formidable challenge since most disease-associated genetic variants do not lie in coding DNA, where effects on protein sequence/structure can be easily predicted, but in the enigmatic non-coding genome where the same DNA sequence can have different biological functions depending on the cell-type and/or external stimuli<sup>10</sup>. Most risk variants are thought to affect gene regulation<sup>12</sup>, but the need to identify the causal gene(s) – which may lie up to one million bases away – and the causal cell-type(s), which may only express the causal gene under specific conditions, have hindered attempts to discover disease mechanisms. For example, although genome-wide association studies (GWAS) have identified over 240 IBD risk loci<sup>3</sup>, fewer than 10 have been mechanistically resolved and, to date, none have led to new therapies.

### **Molecular mechanisms at the pleiotropic chr21q22 locus**

Several genetic variants predispose to more than one disease – highlighting both their biological importance and an opportunity to discover shared disease mechanisms. One

notable example is an intergenic region on chr21q22, where the major (risk) allele haplotype has been independently associated with five different inflammatory diseases<sup>3-6</sup>. Although the associated locus does not contain any genes, there are several nearby candidates including *PSMG1*, *BRWD1* and *ETS2* (**Fig.1a**), all of which have been proposed to be potentially causal in previous studies<sup>3-6,13</sup>. The underlying biological mechanisms, however, remain unknown. We hypothesised that this intergenic locus must contain a distal enhancer and – since the associated diseases are all immune-mediated despite affecting different organs – searched for evidence of enhancer activity in disease-relevant immune cell-types. Using H3K27ac ChIP-seq data, which marks active enhancers/promoters, we found that this locus contains a monocyte/macrophage-specific enhancer (**Fig.1a**). Monocytes and monocyte-derived macrophages play a central role in the pathogenesis of many autoimmune and inflammatory diseases, producing cytokines that are often targeted by the most effective therapies<sup>14</sup>.

To identify the gene regulated by this enhancer, we first considered publicly-available data from human monocytes, including promoter-capture Hi-C<sup>15</sup> and eQTL datasets<sup>16</sup>. We found that the disease-associated locus physically interacts with the promoter of *ETS2*, the most distant of the candidate genes (located 290-kb away) and that the risk haplotype correlates with higher *ETS2* expression, especially after monocyte activation (**Extended Data Fig.1**). Interestingly, however, the disease association was predicted to share a causal variant not with the strong eQTL in activated monocytes, but rather with a weaker eQTL in resting monocytes (**Extended Data Fig.1**). To directly confirm the identity of the target gene, we deleted the 1.85-kb enhancer region in primary human monocytes using CRISPR-Cas9 ribonucleoprotein (RNP) complexes containing gRNAs that flank the enhancer (**Fig.1b**, **Extended Data Fig.2**). These cells were then cultured with combination of inflammatory mediators, including TNF $\alpha$  (a pro-inflammatory cytokine), prostaglandin E2 (a pro-inflammatory lipid) and Pam3CSK4 (a TLR1/2 agonist). This model, termed “TPP”, was designed to mimic a chronic inflammatory environment<sup>17</sup>, and better recapitulates the state

of patient-derived monocytes/macrophages than classical M1 or M2 models (ref.18 and **Extended Data Fig.2**). Because flow cytometry antibodies were not available for any of the candidate genes, we used PrimeFlow to measure the dynamics of RNA transcription and found that expression of all 3 genes (*ETS2*, *BRWD1*, *PSMG1*) increased in unedited cells upon exposure to inflammatory stimuli (**Fig.1c**). Deletion of the chr21q22 enhancer did not affect the increase in *BRWD1* and *PSMG1* expression, but the upregulation of *ETS2* was significantly reduced (**Fig.1d**) – confirming that this pleiotropic locus functions as a distal *ETS2* enhancer in monocytes and monocyte-derived macrophages.

We next sought to discover the variant responsible for disease risk at the chr21q22 locus. Unfortunately, statistical fine-mapping – using the largest IBD GWAS to date<sup>3</sup> – could not identify the causal variant due to high linkage disequilibrium between the candidate single nucleotide polymorphisms (SNPs) (**Methods, Fig.1e**). We therefore used a high-throughput functional approach to first delineate the active enhancers at the locus, and then determine if any candidate SNPs within these regulatory regions might alter enhancer activity. This method – massively-parallel reporter assay (MPRA) – can simultaneously characterise enhancer activity in thousands of short DNA sequences by coupling each to a uniquely-barcoded reporter gene within an expression vector<sup>19</sup>. Genetic sequences that modulate gene expression can be identified by normalising the barcode counts in mRNA extracted from transfected cells to their equivalent counts in the input DNA library. After adapting the MPRA vector for use in primary macrophages (**Methods, Extended Data Fig.3**), we synthesised a pool of overlapping oligonucleotides (oligos) to tile the 2-kb region encompassing all candidate SNPs at chr21q22, and included additional oligos containing either risk or non-risk alleles for every variant. The resulting vector library was transfected into inflammatory macrophages from multiple donors – thus ensuring that a physiological repertoire of transcription factors would be present to interact with the chr21q22 genomic sequences. Using a sliding window analysis to map active enhancers across the tiling sequences, we identified a single 442-bp region of enhancer activity (chr21:40466236-

40466677, hg19; **Fig.1f**) that harboured three (of seven) candidate SNPs. Two of these polymorphisms were transcriptionally inert, but the third (rs2836882) had the strongest expression-modulating effect of any candidate variant, with the risk allele (G) significantly increasing transcription – consistent with the known eQTL (**Fig.1f**). Examining rs2836882 further, we noticed that this SNP lay within an experimentally-confirmed PU.1 ChIP-seq peak in human macrophages (**Fig.1g**). PU.1 is an important myeloid pioneer factor<sup>20</sup> that can bind to heterochromatin, initiate nucleosome remodelling – thus enabling other transcription factors to bind – and activate transcription<sup>21</sup>. To determine whether rs2836882 might affect PU.1 binding, we identified two publicly-available macrophage PU.1 ChIP-seq datasets from rs2836882 heterozygotes and used BaalChIP<sup>22</sup> to assess for allelic imbalances in PU.1 binding. Despite not lying within a canonical PU.1 binding motif, significant allele-specific PU.1 binding was detected at rs2836882, with over 4-fold greater binding to the risk allele in both datasets (**Fig.1h**). This result was replicated in TPP macrophages from five heterozygous donors by immunoprecipitating PU.1 and genotyping the bound DNA (**Extended Data Fig.4**). Together, this suggests that the rs2836882 risk allele should increase enhancer activity, consistent with the MPRA and eQTL results.

To test whether allele-specific enhancer activity was evident at the endogenous locus, we performed H3K27ac ChIP-seq in inflammatory macrophages from two rs2836882 major allele homozygotes and two minor allele homozygotes. While several nearby enhancer peaks were similar between these donors, the enhancer activity overlying rs2836882 was considerably stronger in major (risk) allele homozygotes (**Fig.1i**), contributing to a ~2.5-fold increase in enhancer activity across the extended chr21q22 locus (**Extended Data Fig.4**). Collectively, these data reveal a genetic mechanism whereby the putative causal variant at chr21q22 – identified via its functional consequences in primary macrophages – promotes binding of a pioneer transcription factor and increases the activity of a long-range *ETS2* enhancer.

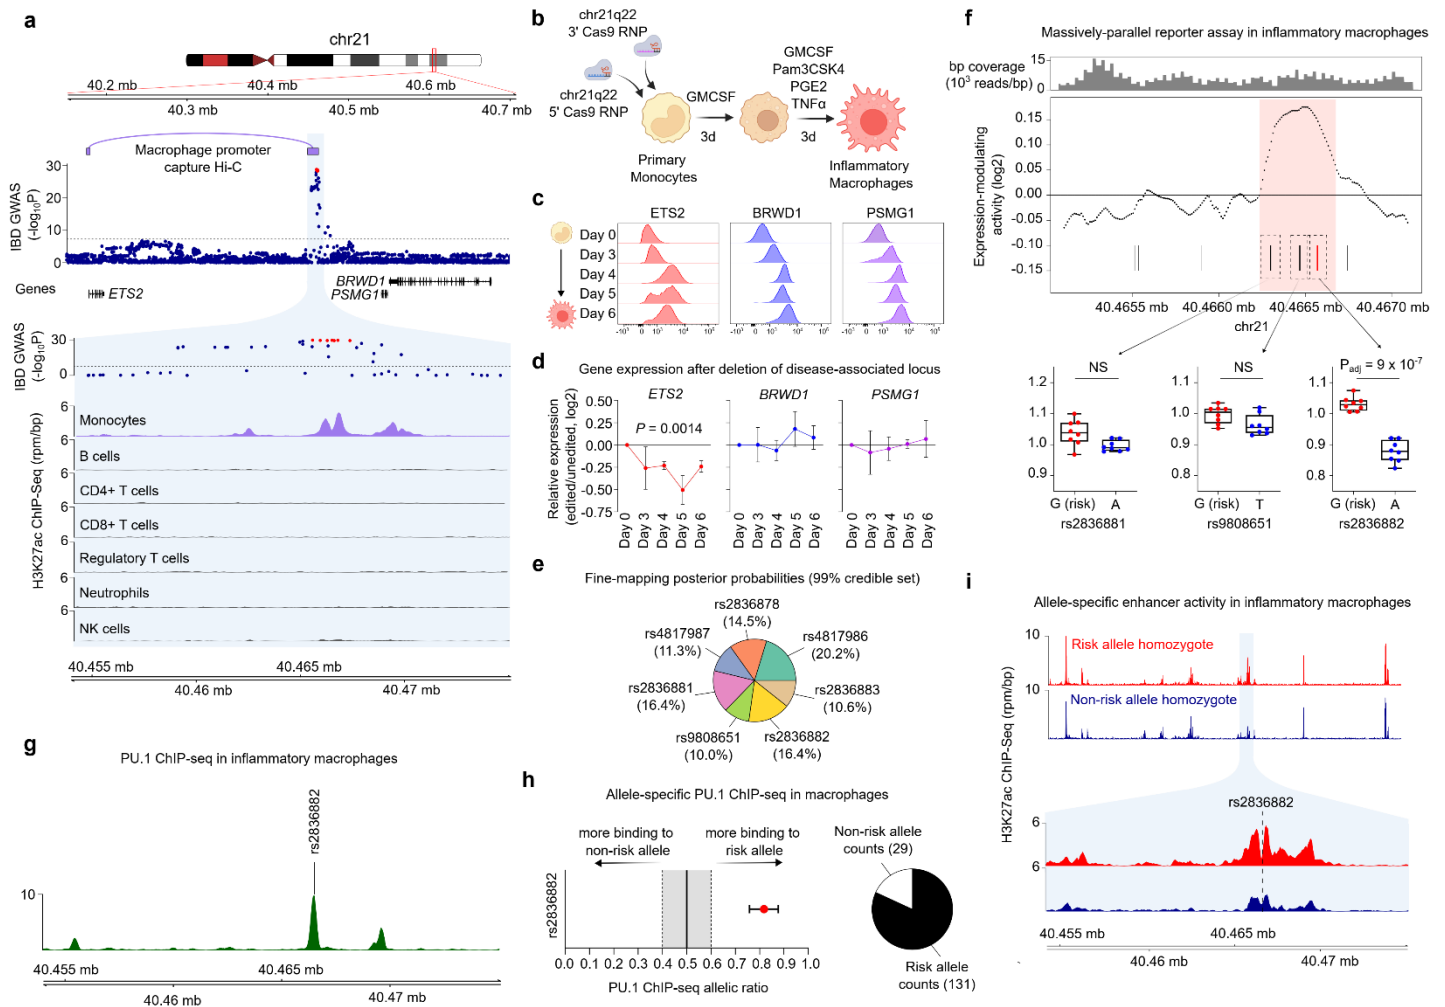

**Figure 1. Resolving molecular mechanisms at chr21q22.**

**a.** Annotation of the disease-associated chr21q22 locus depicting the IBD genetic association, physical interactions of the disease-associated haplotype in macrophages (promoter-capture Hi-C), and H3K27ac ChIP-seq data from various immune cell-types. **b.** Schematic of experiment to determine the function of the chr21q22 locus in monocyte-derived macrophages polarised under chronic inflammatory (“TPP”) conditions. **c.** Histograms depicting the expression of *ETS2*, *BRWD1*, and *PSMG1* during inflammatory macrophage polarisation, measured using PrimeFlow RNA assays that quantify RNA by flow cytometry. Data are representative of one of four donors. **d.** Relative *ETS2*, *BRWD1*, and *PSMG1* expression in chr21q22-edited inflammatory macrophages (relative to non-targeting control cells; NTC). Plot shows log<sub>2</sub> fold-change in mean fluorescence intensity (n=4, data represent mean±SEM, two-way ANOVA). **e.** SuSiE fine-mapping posterior probabilities for IBD-associated SNPs at the 21q22 locus (99% credible set). **f.** MPRA at the chr21q22 locus depicting oligonucleotide coverage (top), enhancer activity in inflammatory macrophages (analysed using a sliding window analysis of tiling oligos; middle), and expression-modulating effects of candidate SNPs within the identified enhancer (bottom) (n=8). Shaded region in enhancer activity plot indicates region of significant enhancer activity. **g.** PU.1 ChIP-seq peaks at the chr21q22 locus in macrophages. **h.** BaalChIP analysis of allele-specific PU.1 binding at rs2836882 in two heterozygous macrophage datasets (data represent 95% posterior distribution of allelic binding ratio) **i.** H3K27ac ChIP-seq data from major (top) or minor (bottom) allele homozygotes at the chr21q22 locus. Data are representative of two of four donors.



## 1 **ETS2 is essential for macrophage inflammatory responses**

2 Having identified a plausible mechanism by which the chr21q22 risk haplotype increases  
3 *ETS2* expression, we sought to better understand the role of *ETS2* in  
4 monocytes/macrophages. *ETS2* is a member of the ETS family of transcription factors, which  
5 has been mainly studied as a proto-oncogene in cancer<sup>23</sup>. In contrast, the role of *ETS2* in  
6 primary human macrophages has been less clearly defined, with previous studies using either  
7 cell-lines or complex mouse models and largely focusing on a limited number of downstream  
8 molecules<sup>24-28</sup>. This has led to contradictory reports, with *ETS2* being described as both  
9 necessary and redundant for macrophage development<sup>29,30</sup>, and both pro- and anti-  
10 inflammatory<sup>24-28</sup>. To elucidate the specific role of *ETS2* in inflammatory human macrophages  
11 – and determine how dysregulated *ETS2* expression might contribute to disease – we first  
12 used a CRISPR-Cas9-based loss-of-function approach (**Fig.2a**). Two gRNAs targeting  
13 different *ETS2* exons were designed, validated and individually incorporated into Cas9 RNPs  
14 for transfection into primary monocytes – thereby minimising the chance that any effect was  
15 due to off-target editing. These gRNAs resulted in on-target editing in ~89% and ~79% of total  
16 cells respectively (**Extended Data Fig.2**). No differences in cell viability or expression of  
17 macrophage markers were observed with either gRNA, suggesting that *ETS2* was not  
18 required for inflammatory macrophage survival or differentiation (**Extended Data Fig.2**). In  
19 contrast, production of pro-inflammatory cytokines, including IL-6, IL-8 and IL-1 $\beta$ , was  
20 significantly reduced following *ETS2* disruption (**Fig.2b**), whereas IL-10 – an anti-inflammatory  
21 cytokine – was less affected. TNF $\alpha$  secretion could not be assessed as it was included in the  
22 differentiation culture. We therefore investigated whether *ETS2* was also required for other  
23 macrophage effector functions. First, we examined phagocytosis using fluorescently-labelled  
24 particles that can be detected by flow cytometry. Similar to pro-inflammatory cytokine  
25 production, phagocytosis was significantly impaired following *ETS2* disruption (**Fig.2c**). We  
26 next measured extracellular reactive oxygen species (ROS) production – a key effector  
27 response that directly contributes to tissue damage in inflammatory disease<sup>31</sup>. Disrupting  
28 *ETS2* profoundly reduced the oxidative burst following macrophage activation – an effect that



29 appeared to be due to reduced expression of key NADPH oxidase components (**Fig.2d**,  
30 **Extended Data Fig.5**). Together, this suggests that *ETS2* is required for multiple effector  
31 functions in inflammatory macrophages.

32 To better understand the molecular basis for these distinct functional effects, we performed  
33 RNA-sequencing (RNA-seq) in *ETS2*-edited and unedited inflammatory macrophages from  
34 multiple donors. Disruption of *ETS2* led to widespread transcriptional changes, with reduced  
35 expression of many inflammatory genes, including several well-known initiators and amplifiers  
36 of inflammation (**Fig.2e**). Affected gene classes included cytokines (e.g. *TNFSF10/TRAIL*,  
37 *TNFSF13*, *IL1A*, *IL1B*), chemokines (e.g. *CXCL1*, *CXCL3*, *CXCL5*, *CCL2*, *CCL5*), secreted  
38 effector molecules (e.g. *S100A8*, *S100A9*, *MMP14*, *MMP9*), cell surface receptors (e.g.  
39 *FCGR2A*, *FCGR2C*, *TREM1*), pattern recognition receptors (e.g. *TLR2*, *TLR6*, *NOD2*), and  
40 signalling molecules (e.g. *MAP2K*, *GPR84*, *NLRP3*). To better characterise the pathways  
41 affected by *ETS2* deletion, we performed gene-set enrichment analysis (GSEA) using the  
42 Gene Ontology Biological Pathways dataset. This corroborated the observed functional effects  
43 (**Fig.2f**), with the most negatively-enriched pathways (downregulated following *ETS2*  
44 disruption) relating to macrophage activation, pro-inflammatory cytokine production,  
45 phagocytosis and ROS production. Genes involved in macrophage migration were also  
46 significantly downregulated, but gene sets relating to monocyte-to-macrophage differentiation  
47 were not significantly affected – consistent with *ETS2* being required for inflammatory effector  
48 functions, but not influencing monocyte-to-macrophage development. Although fewer genes  
49 increased in expression following *ETS2* deletion (**Fig.2e**), positive enrichment was noted for  
50 genes involved in aerobic respiration and oxidative phosphorylation (OXPHOS; **Fig.2f**) –  
51 metabolic processes linked to anti-inflammatory macrophage behaviour<sup>32</sup>. Collectively, these  
52 data identify an indispensable role for *ETS2* in a range of macrophage effector functions,  
53 which could explain why dysregulated *ETS2* expression is associated with multiple  
54 inflammatory diseases. Indeed, deletion of the disease-associated chr21q22 enhancer  
55 phenocopied both the transcriptional and functional consequences of disrupting *ETS2* (**Fig.2g**,  
56 **Extended Data Fig.5**).

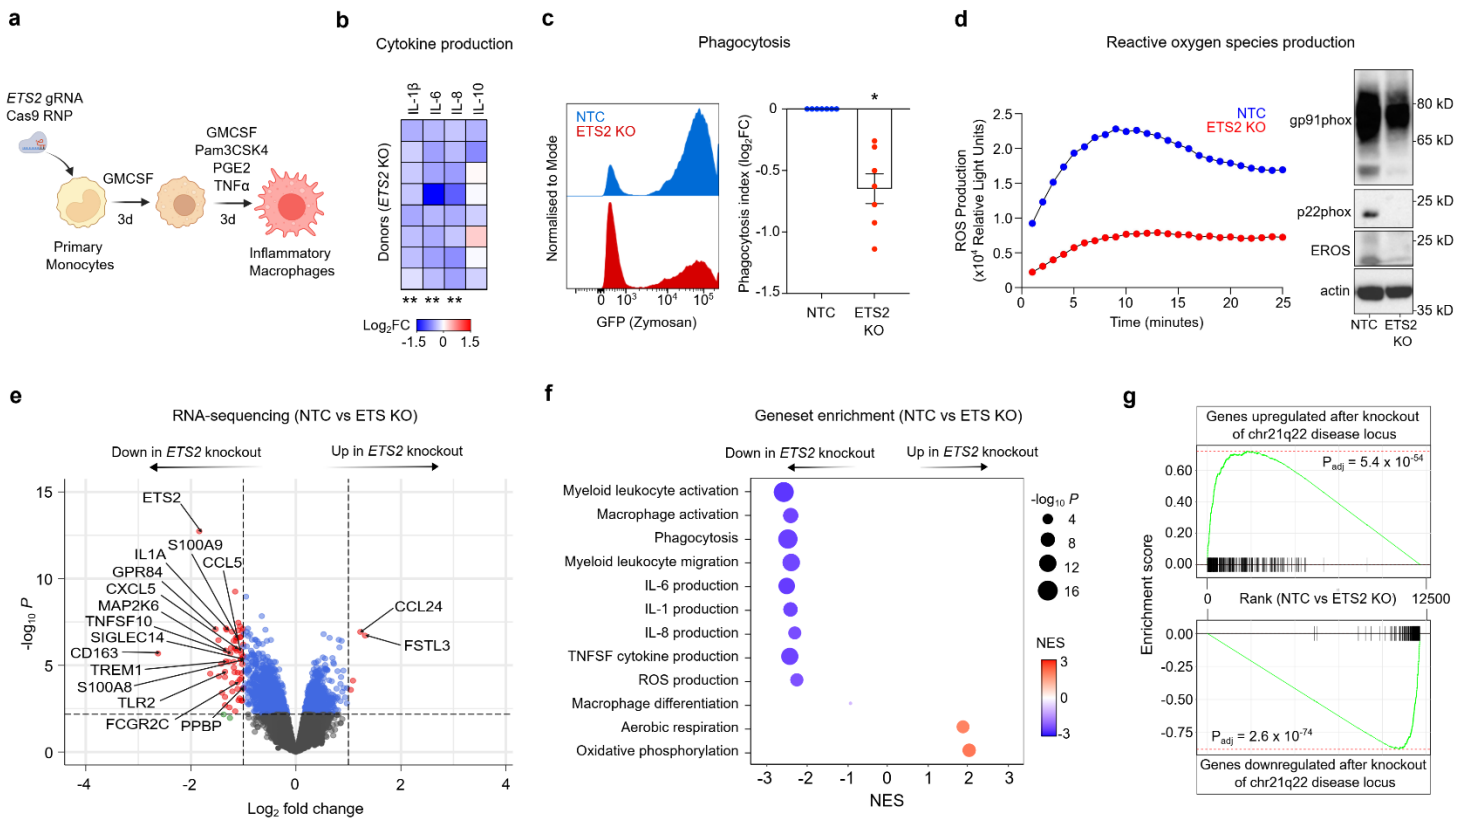

**Figure 2. *ETS2* is essential for macrophage inflammatory responses.**

**a.** Schematic of experiment for disrupting *ETS2* in primary monocytes and differentiating monocyte-derived macrophages under chronic inflammatory conditions. **b.** Macrophage cytokine secretion following *ETS2* disruption. Heatmap shows log<sub>2</sub> fold-change of cytokine concentrations in the supernatants of *ETS2*-edited macrophages relative to unedited macrophages transfected with a non-targeting control gRNA-containing RNP (NTC). n=9, Wilcoxon matched-pairs test, two-tailed. **c.** Histogram depicting phagocytosis of fluorescently-labelled zymosan particles by *ETS2*-edited and unedited macrophages (left). Data representative of one of seven donors. Phagocytosis index in *ETS2*-edited and unedited macrophages (calculated as product of proportion and mean fluorescence intensity of phagocytosing cells; right). Plot depicts log<sub>2</sub> fold-change in phagocytosis index for *ETS2*-edited macrophages relative to unedited cells (Wilcoxon signed-rank test, two-tailed; data represent mean±SEM). **d.** Production of ROS by *ETS2*-edited and unedited inflammatory macrophages (measured in relative light units; left). Data representative of one of six donors. Western blot for gp91phox, p22phox, and EROS expression in *ETS2*-edited and unedited macrophages (right). Data representative of one of three donors. **e.** Differentially-expressed genes in *ETS2*-edited versus unedited inflammatory macrophages (limma with voom transformation, n=8). **f.** Gene set enrichment analysis (GSEA) of differentially-expressed genes between *ETS2*-edited and unedited inflammatory macrophages. Results of selected Gene Ontology Biological Pathways shown. Dot size represents P-value and colour denotes normalised enrichment score (NES). **g.** Enrichment of differentially-expressed genes following deletion of the disease-associated chr21q22 locus (upregulated genes, top; downregulated genes, bottom) in *ETS2*-edited versus unedited macrophages. \*  $P < 0.05$ , \*\*  $P < 0.01$ .

## 57 **ETS2 orchestrates macrophage inflammatory responses**

58 Having found that *ETS2* was essential for monocyte-derived macrophage effector functions,  
59 we next investigated whether it might also be sufficient to drive them – as would be expected  
60 of a master regulator of inflammatory responses. This was particularly important because  
61 although loss-of-function approaches can identify a gene’s biological role(s), the chr21q22 risk  
62 haplotype increases *ETS2* expression. To do this, we first optimised a method for controlled  
63 overexpression of target genes in primary macrophages by transfecting defined amounts of *in*  
64 *vitro* transcribed mRNA that was modified to minimise immunogenicity (**Fig.3a, Extended**  
65 **Data Fig.3, Methods**). Resting, non-activated (M0) macrophages were then transfected with  
66 mRNA encoding *ETS2* or its reverse complement – thereby controlling for quantity, length and  
67 purine/pyrimidine composition of the transfected mRNA but with a transcript that would not be  
68 translated (**Fig.3b**). After transfection, cells were exposed to low-dose lipopolysaccharide for 6  
69 hours to initiate a low-grade inflammatory response that could be amplified if *ETS2* was  
70 sufficient to drive inflammatory responses (**Fig.3a**). We first quantified secreted cytokines and  
71 found that *ETS2* overexpression increased production of several pro-inflammatory cytokines,  
72 although IL-10 was again less affected (**Fig.3c**). To better characterise the consequences of  
73 *ETS2* overexpression, we performed RNA-seq and examined the macrophage activation  
74 pathways that had required *ETS2*. Strikingly, all of these inflammatory pathways – including  
75 macrophage activation, pro-inflammatory cytokine production, ROS production, phagocytosis  
76 and migration – were induced in a dose-dependent manner following *ETS2* overexpression,  
77 with greater enrichment of every pathway when more *ETS2* mRNA was transfected (**Fig.3d**).  
78 This shows that *ETS2* is both necessary and sufficient for inflammatory responses in human  
79 macrophages, consistent with being a master regulator of effector functions during chronic  
80 inflammation, whose dysregulation is directly linked to human disease.

81

## 82 **ETS2-regulated genes play a central role in IBD**

83 To understand whether *ETS2* might contribute to the macrophage phenotype observed in  
84 inflammatory disease, we compared the transcriptional consequences of overexpressing  
85 *ETS2* with a gene signature of intestinal macrophages from Crohn's disease – one of the  
86 conditions associated with the chr21q22 locus. Single cell RNA-seq analysis has previously  
87 shown that active Crohn's disease is characterised by an expanded population of  
88 inflammatory monocyte-derived macrophages that contributes to anti-TNF $\alpha$  resistance<sup>7</sup>. Using  
89 the Crohn's disease macrophage signature as a gene set, we found that overexpressing  
90 *ETS2* in resting macrophages induced a transcriptional state that closely resembled disease  
91 macrophages, with core ("leading edge") enrichment of the majority of genes in the signature,  
92 including many that encode therapeutic targets (**Fig.3e**).

93 Given the importance of *ETS2* in macrophage responses, and the fact that *ETS2*  
94 overexpression phenocopied a disease-associated inflammatory state, we hypothesised that  
95 other genetic associations might also implicate this previously uncharacterised pathway. An  
96 important goal of GWAS was to identify key disease pathways<sup>10</sup>, but this has proven  
97 challenging due to a paucity of confidently-identified causal genes and a limited understanding  
98 of how these are affected by genetic variation<sup>10</sup>. To better characterise the genetic risk  
99 attributable to the macrophage *ETS2* pathway, we focused on IBD since this has far more  
100 genetic associations than any other chr21q22-associated disease. Examining the list of  
101 commonly downregulated genes following *ETS2* editing ( $P_{\text{adj}} < 0.05$  for both gRNAs), we  
102 identified over 20 IBD risk genes – including many that have been proposed to be causal at  
103 their respective loci<sup>3,33</sup> (**Extended Data Table 1**). These included genes that are thought to  
104 affect macrophage biology (e.g. *SP140*, *LACC1/FAMIN*, *CCL2*, *CARD9*, *CXCL5*, *TLR4*,  
105 *SLAMF8*, *FCGR2A*) as well as some that are highly expressed in macrophages but not  
106 previously linked to specific pathways (e.g. *ADCY7*, *PTPRC*, *TAGAP*, *PTAFR*, *PDLIM5*). To  
107 more formally assess the enrichment of an *ETS2*-regulated inflammatory pathway in IBD  
108 genetics – and compare this to known disease pathways – we used SNPsea<sup>34</sup>, an algorithm  
109 designed to identify pathways affected by disease loci. 241 IBD-associated genetic loci were  
110 tested for enrichment in 7,660 pathways, comprising 7,658 Gene Ontology Biological

111 Pathways and 2 overlapping lists of ETS2-regulated genes (either those downregulated  
112 following *ETS2* editing or upregulated following *ETS2* overexpression). Significance of  
113 enrichment was empirically computed using 5 million matched null SNP sets, and disease  
114 pathways previously implicated by genetics were extracted for comparison. Strikingly, ETS2  
115 target genes – however they were defined – were more strongly enriched for IBD-associated  
116 loci than almost all previously implicated pathways, with not a single null SNP set showing  
117 greater enrichment in either of the ETS2-regulated gene lists. After applying a stringent  
118 Bonferroni multiple-testing correction, only ETS2-regulated genes and IBD pathways relating  
119 to T cell activation, T-helper 17 cells, autophagy and IL-10 signalling showed significant  
120 enrichment (**Fig.3f**). This suggests that ETS2 signalling in macrophages plays a fundamental  
121 role in IBD pathogenesis, with stronger genetic enrichment than most previously implicated  
122 pathways.

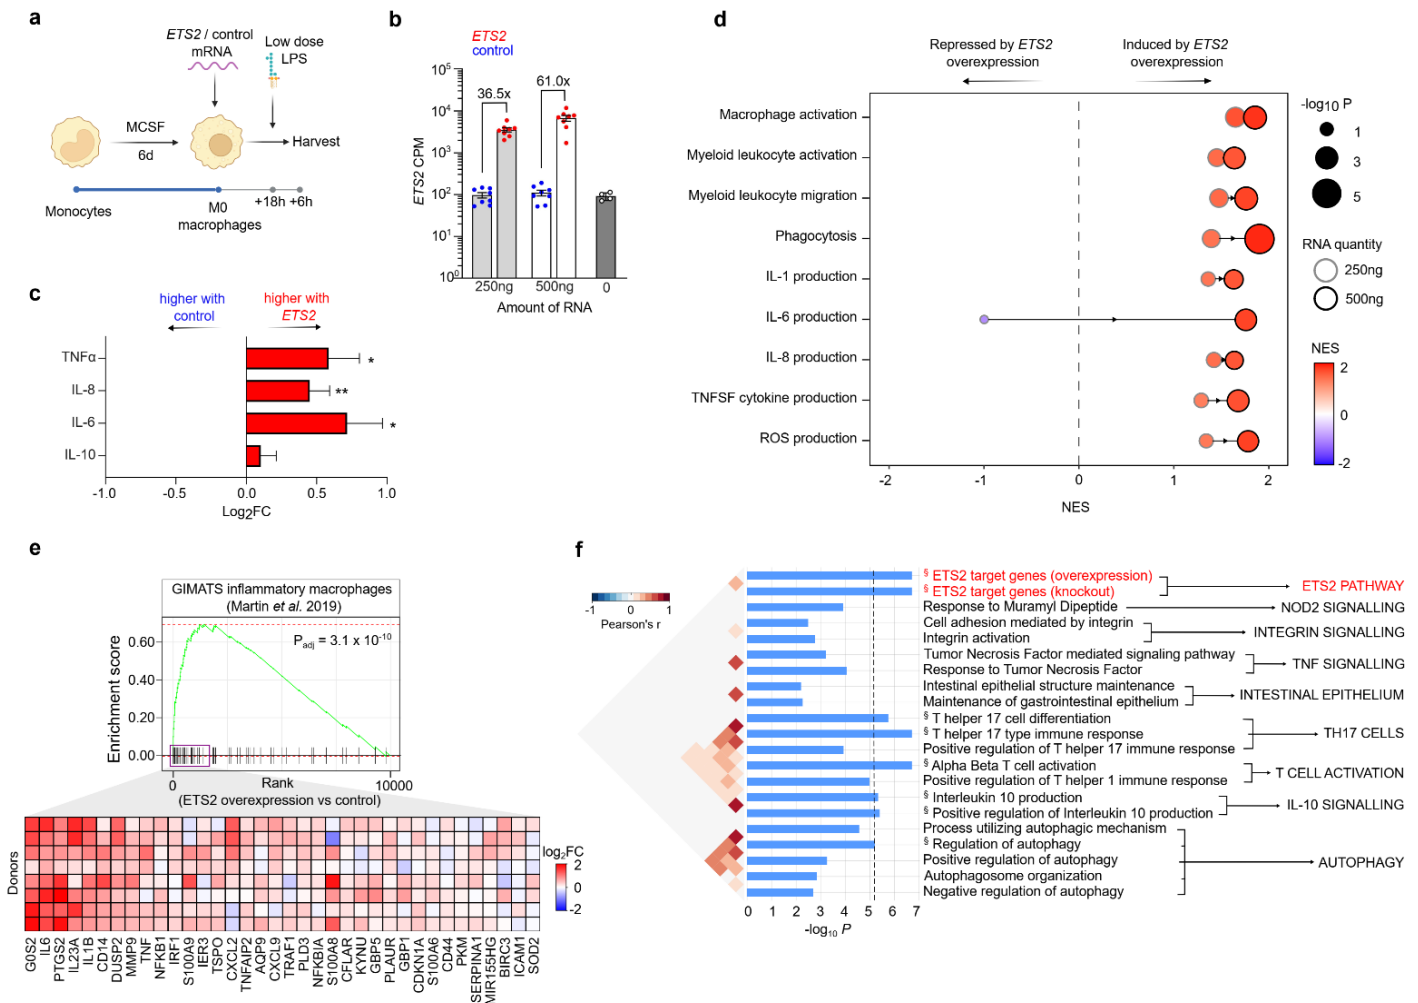

**Figure 3. *ETS2* orchestrates macrophage inflammatory responses.**

**a.** Schematic of *ETS2* overexpression experiment. Resting (M0) human macrophages were transfected with pre-defined amounts of *in vitro* transcribed *ETS2* mRNA or control mRNA (*ETS2* reverse complement), activated with low dose LPS (0.5ng/ml), and harvested. n=8. **b.** *ETS2* mRNA levels in macrophages transfected with *ETS2* or control mRNA or untransfected (from separate experiment). **c.** Cytokine secretion following *ETS2* overexpression. Plot shows log<sub>2</sub> fold-change of cytokine concentrations in macrophage supernatants (*ETS2* relative to control) following transfection with 500ng mRNA. **d.** Gene set enrichment analysis (fGSEA) of differentially-expressed genes between *ETS2*-overexpressing and control macrophages. Results shown for the same Gene Ontology Biological Pathways that were negatively enriched following *ETS2* editing. Dot size represents P-value, colour denotes normalised enrichment score (NES), and border colour denotes amount of transfected mRNA. **e.** Enrichment of a disease-associated inflammatory macrophage gene signature, derived from single cell RNA-seq of Crohn's disease intestinal biopsies, in *ETS2*-overexpressing macrophages (relative to control; top). Heatmap of leading-edge genes showing log<sub>2</sub> fold-change of gene expression in *ETS2*-overexpressing macrophages relative to control (500ng mRNA; bottom). **f.** SNPsea analysis of enrichment of 241 IBD-associated loci within *ETS2*-regulated genes (red) and pathways previously linked to IBD pathogenesis (black). Significantly enriched pathways (Bonferroni-corrected permutation P < 0.05) indicated by §. \* P < 0.05, \*\* P < 0.01.



## 123 **ETS2 controls inflammatory responses via transcriptional and metabolic effects**

124 We next sought to understand how *ETS2* controlled such diverse macrophage effector  
125 functions. Studying *ETS2* biology is challenging because no ChIP-seq-grade antibodies exist,  
126 precluding direct identification of its transcriptional targets. Even the ENCODE project, which  
127 performed ChIP-seq for 181 transcription factors, was unable to directly immunoprecipitate  
128 *ETS2*<sup>35</sup>. We therefore first used a “guilt-by-association” approach to identify genes that were  
129 co-expressed with *ETS2* across 64 different human macrophage polarisation conditions<sup>17</sup>.  
130 This identified *PFKFB3* – encoding the rate-limiting enzyme of glycolysis – as the most highly  
131 co-expressed gene, with *HIF1A* also highly co-expressed (**Fig.4a**). Together, these genes are  
132 known to facilitate a “glycolytic switch” that is required for myeloid inflammatory responses<sup>36</sup>.  
133 We therefore hypothesised that *ETS2* might control inflammatory responses via metabolic  
134 reprogramming – a possibility supported by OXPHOS genes being negatively correlated with  
135 *ETS2* expression (**Fig.4a**) and upregulated following *ETS2* disruption (**Fig.2f**). To assess the  
136 metabolic consequences of disrupting *ETS2*, we quantified label incorporation from <sup>13</sup>C-  
137 glucose in edited and unedited inflammatory macrophages using gas chromatography–mass  
138 spectrometry (GC-MS). Widespread modest reductions in labelled and total glucose  
139 metabolites were detected following *ETS2* disruption (**Fig.4b, Extended Data Fig.6**). This  
140 affected both glycolytic and TCA cycle metabolites, with significant reductions in intracellular  
141 and secreted lactate, a hallmark of anaerobic glycolysis, and succinate, an important  
142 inflammatory signalling metabolite<sup>37</sup>. These results would be consistent with glycolytic  
143 suppression, with reductions in TCA metabolites being due to reduced flux into TCA and  
144 increased consumption by mitochondrial OXPHOS<sup>38</sup>. To determine whether metabolic  
145 changes were responsible for *ETS2*-mediated inflammatory effects, we treated *ETS2*-edited  
146 macrophages with roxadustat, a HIF1 $\alpha$  stabiliser that promotes glycolysis via HIF1 $\alpha$ -mediated  
147 metabolic reprogramming. This had the predicted effect on genes involved in glycolysis and  
148 OXPHOS, but did not rescue the effects of *ETS2* disruption, either transcriptionally or  
149 functionally (**Fig.4c, Extended Data Fig.6**). Thus, while disrupting *ETS2* does alter  
150 glycometabolism, this does not fully explain the observed differences in inflammation.



151 To try to elucidate the mechanism by which ETS2 controlled such diverse inflammatory  
152 effects, we revisited whether we could directly identify ETS2 target genes. Using a range of  
153 anti-ETS2 antibodies, we confirmed that none worked for ChIP-seq (data not shown) so  
154 investigated whether any might work for Cleavage-Under-Targets-and-Release-Using-  
155 Nuclease (CUT&RUN), which does not require formaldehyde fixation. One antibody identified  
156 multiple, significantly-enriched genomic regions (peaks) of which 6,560 were reproducibly  
157 detected across two biological replicates (Irreproducible Discovery Rate cut-off 0.01) with  
158 acceptable quality metrics<sup>39</sup> (**Fig.4d**). These peaks were mostly located in active regulatory  
159 regions (90% in promoters or active enhancers, **Fig.4e**) and were highly enriched for a  
160 canonical ETS2 binding motif (4.02-fold enrichment over global controls, **Fig.4f**) – consistent  
161 with being sites of ETS2 binding. After combining the biological replicates to improve peak  
162 detection, we identified ETS2 binding at the promoters of many inflammatory genes, including  
163 several that are essential for distinct macrophage functions, such as *NCF4* (encoding a key  
164 NADPH oxidase component), *NLRP3* (encoding a key inflammasome component), and *TLR4*  
165 (encoding a key pattern recognition receptor) (**Fig.4g**). Overall, 48.3% of genes dysregulated  
166 following *ETS2* disruption, and 50.3% of genes dysregulated following *ETS2* overexpression,  
167 contained an ETS2 binding peak within their core promoter or putative cis-regulatory elements  
168 (**Fig.4h**) – consistent with ETS2 directly regulating a range of macrophage inflammatory  
169 responses. Notably, these gene targets included *HIF1A*, *PFKFB3*, and other glycolytic genes  
170 (e.g. *GPI*, *HK2*, and *HK3*), suggesting that the observed metabolic changes might be directly  
171 induced by ETS2, rather than being solely attributable to differences in inflammation.  
172 Intriguingly, we also detected ETS2 binding at its own enhancer at chr21q22 (**Fig.4i**). This is  
173 consistent with reports that PU.1 and ETS2 can interact synergistically<sup>40</sup>, and would implicate  
174 a feed-forward mechanism at the disease-associated locus, where increased *ETS2*  
175 expression reinforces *ETS2* enhancer activity. Together, these data implicate ETS2 as a  
176 master regulator of monocyte/macrophage responses during chronic inflammation, capable of  
177 directing a multifaceted effector programme, and creating a metabolic environment that is  
178 permissive for inflammation.

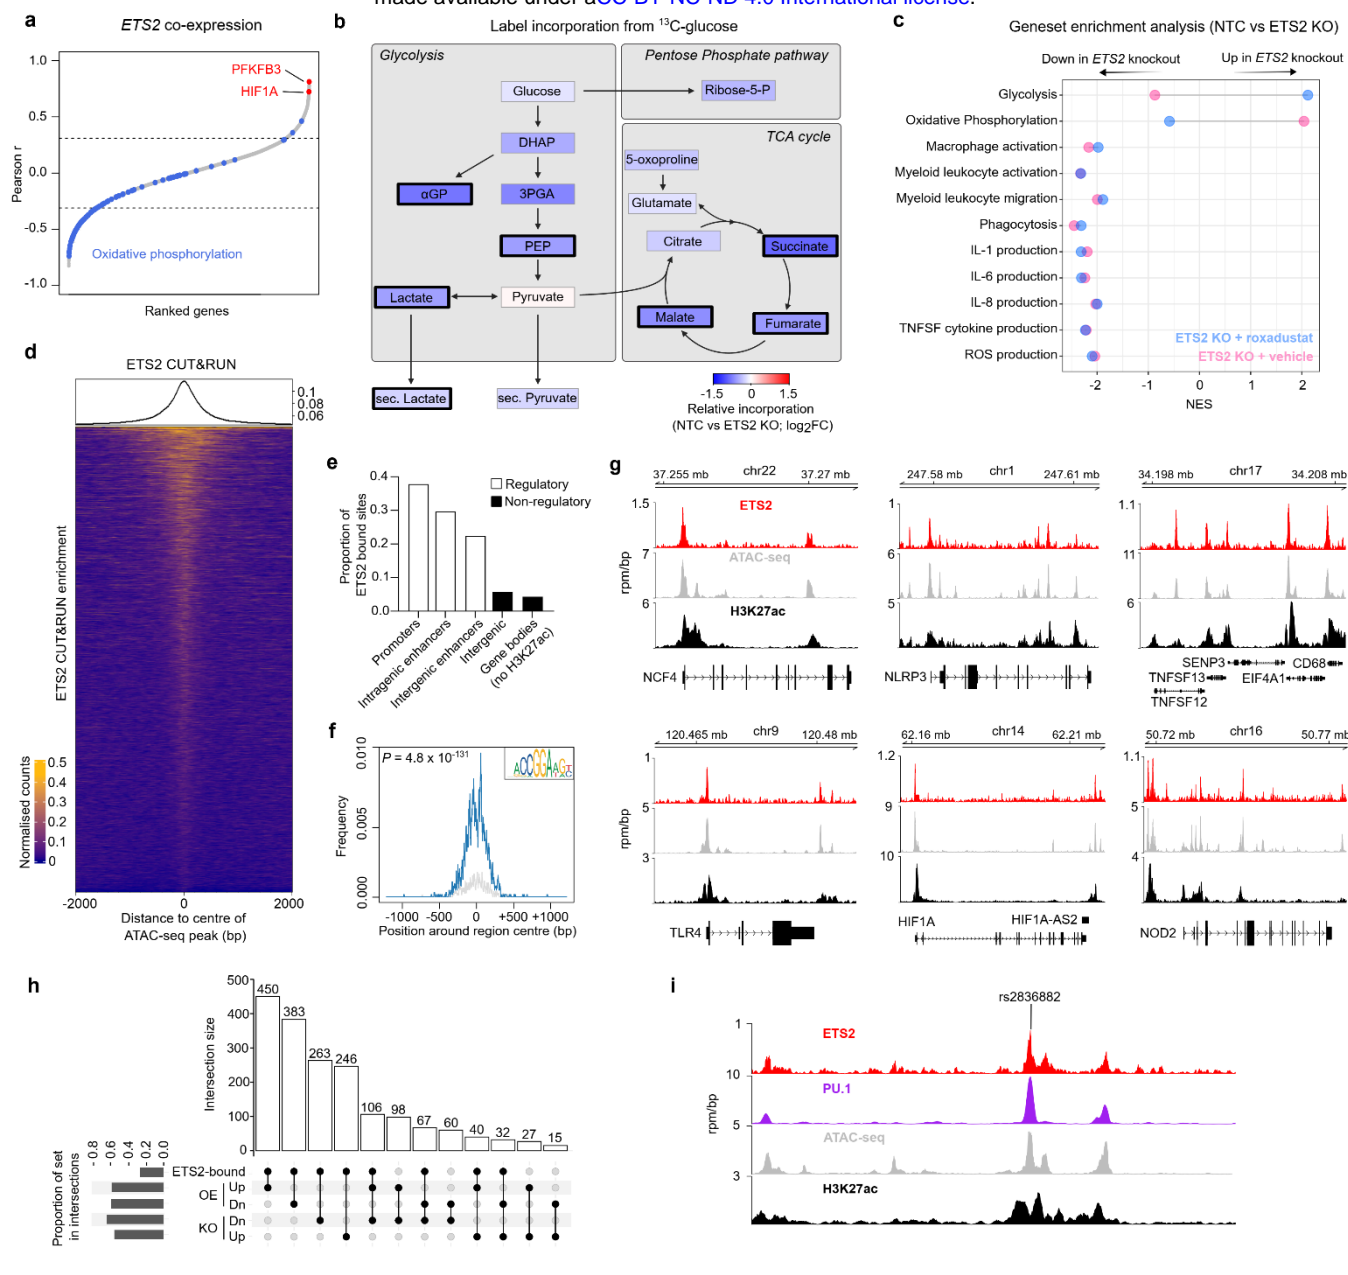

**Figure 4. *ETS2* directs macrophage responses via transcriptional and metabolic effects.**

**a.** Genes co-expressed with *ETS2* in 64 monocyte-derived macrophage datasets. Dotted lines equivalent to FDR  $P < 0.05$ . **b.** Effect of *ETS2* disruption on glucose metabolism. Colour denotes median log<sub>2</sub> fold-change in label incorporation from  $^{13}\text{C}$ -glucose in *ETS2*-edited cells relative to unedited cells. Bold black border denotes  $P < 0.05$  (Wilcoxon matched-pairs, two-tailed,  $n=6$ ). **c.** Gene set enrichment analysis (fGSEA) of differentially-expressed genes between *ETS2*-edited and unedited TPP macrophages, treated with either roxadustat or vehicle. Results for selected Gene Ontology Biological Pathways shown. **d.** Enrichment heatmap of *ETS2* CUT&RUN peaks (IDR cut-off 0.01,  $n=2$ ) in accessible chromatin from TPP macrophages (4-kb regions centred on ATAC-seq peaks). **e.** Features of *ETS2* binding sites (based on gene coordinates and H3K27ac ChIP-seq in TPP macrophages). **f.** Enrichment of an *ETS2* binding motif in *ETS2* CUT&RUN peaks (hypergeometric P-value). **g.** *ETS2* binding, chromatin accessibility (ATAC-seq), and enhancer activity (H3K27ac) at selected loci. **h.** UpSet plot of intersections between *ETS2* gene lists, including genes with *ETS2* peaks in their core promoters or cis-regulatory elements and significantly up- (Up) or down-regulated (Dn) genes following *ETS2* editing (KO) or overexpression (OE). Vertical bars denote shared genes between lists, indicated by connected dots in lower panel. Horizontal bars denote proportion of gene list within intersections. **i.** *ETS2* binding, chromatin accessibility (ATAC-seq), and enhancer activity (H3K27ac) at the disease-associated chr21q22 locus.

179 **ETS2-driven inflammation is evident in diseased tissue and can be targeted**  
180 **pharmacologically.**

181 The strong enrichment of IBD GWAS hits within ETS2-regulated genes led us to hypothesise  
182 that the transcriptional footprint of this pathway might be generally detectable in the affected  
183 tissues of chr21q22-associated diseases – a possibility that would have important therapeutic  
184 implications. Using publicly-available gene expression data from diseases linked to chr21q22  
185 – intestinal macrophages from IBD, synovium from ankylosing spondylitis (AS), and liver from  
186 PSC – we confirmed that diseased tissue was significantly enriched for ETS2-regulated genes  
187 (**Fig.5a, Extended Data Fig.7**). We therefore investigated whether this pathway could be  
188 pharmacologically targeted. Specific ETS2 inhibitors do not exist and structural analyses  
189 indicate that there is no allosteric inhibitory mechanism that could be easily targeted<sup>41</sup>. We  
190 therefore used the NIH LINCS database to identify drugs that might modulate ETS2 activity<sup>8</sup>.  
191 This repository contains over 30,000 differentially-expressed genelists from cell-lines exposed  
192 to over 6,000 small molecules. Using fGSEA, 906 drug signatures were found to mimic the  
193 transcriptional effect of disrupting *ETS2* in inflammatory macrophages ( $P_{adj} < 0.05$ ), including  
194 several approved treatments for IBD and AS (e.g. JAK inhibitors). Of these candidate  
195 therapies, the most common class were MEK inhibitors (**Fig.5b**), which are already licensed  
196 for non-inflammatory human diseases (e.g. neurofibromatosis). This result was not due to a  
197 single compound, but rather a class effect with multiple MEK1/2 inhibitors downregulating  
198 ETS2 target genes (**Fig.5c**). This made biological sense, since MEK1 and MEK2 – together  
199 with several other targets identified – are known upstream regulators of ETS-family  
200 transcription factors (**Fig.5d**). Indeed, some of these drug classes, including MEK1/2 and  
201 HSP90 inhibitors, have been reported to be beneficial in animal colitis models, although this is  
202 often a poor indicator of clinical efficacy – with several approved IBD treatments being  
203 ineffective in mice and many drugs that improve mouse models being ineffective in human  
204 IBD<sup>42</sup>. To determine whether MEK inhibition would abrogate ETS2-driven inflammatory  
205 responses in primary human macrophages, we differentiated monocytes under chronic  
206 inflammatory conditions and treated them with a selective, non-ATP competitive MEK inhibitor

207 (PD-0325901; **Fig.5e**). We observed potent anti-inflammatory activity that phenocopied the  
208 effect of disrupting *ETS2* or deleting the chr21q22 enhancer (**Fig.5f, Extended Data Fig.8**),  
209 with downregulation of multiple *ETS2*-regulated pathways (including several drug targets;  
210 **Fig.5g**). To further explore the therapeutic potential of targeting *ETS2* signalling<sup>42</sup>, we  
211 employed a human gut explant model. Intestinal mucosal biopsies were obtained from  
212 patients with active IBD, who were not receiving immunosuppressive or biologic therapies,  
213 and cultured with either a MEK inhibitor or a negative or positive control (**Methods**). Release  
214 of multiple IBD-associated inflammatory cytokines was significantly reduced by MEK inhibition  
215 – to comparable levels observed with infliximab (an anti-TNF $\alpha$  antibody widely used for IBD;  
216 **Fig.5h**). Moreover, we confirmed that expression of *ETS2*-regulated genes was reduced  
217 (**Fig.5i, Extended Data Fig.8**) and that there was significant improvement in a validated  
218 transcriptional inflammation score<sup>43</sup> that reflects IBD-associated inflammation and has been  
219 shown to reduce upon effective therapy (**Fig.5j**). Together, this shows that targeting an  
220 upstream regulator of *ETS2* can abrogate pathological inflammation in a chr21q22-associated  
221 disease, and may be useful therapeutically.

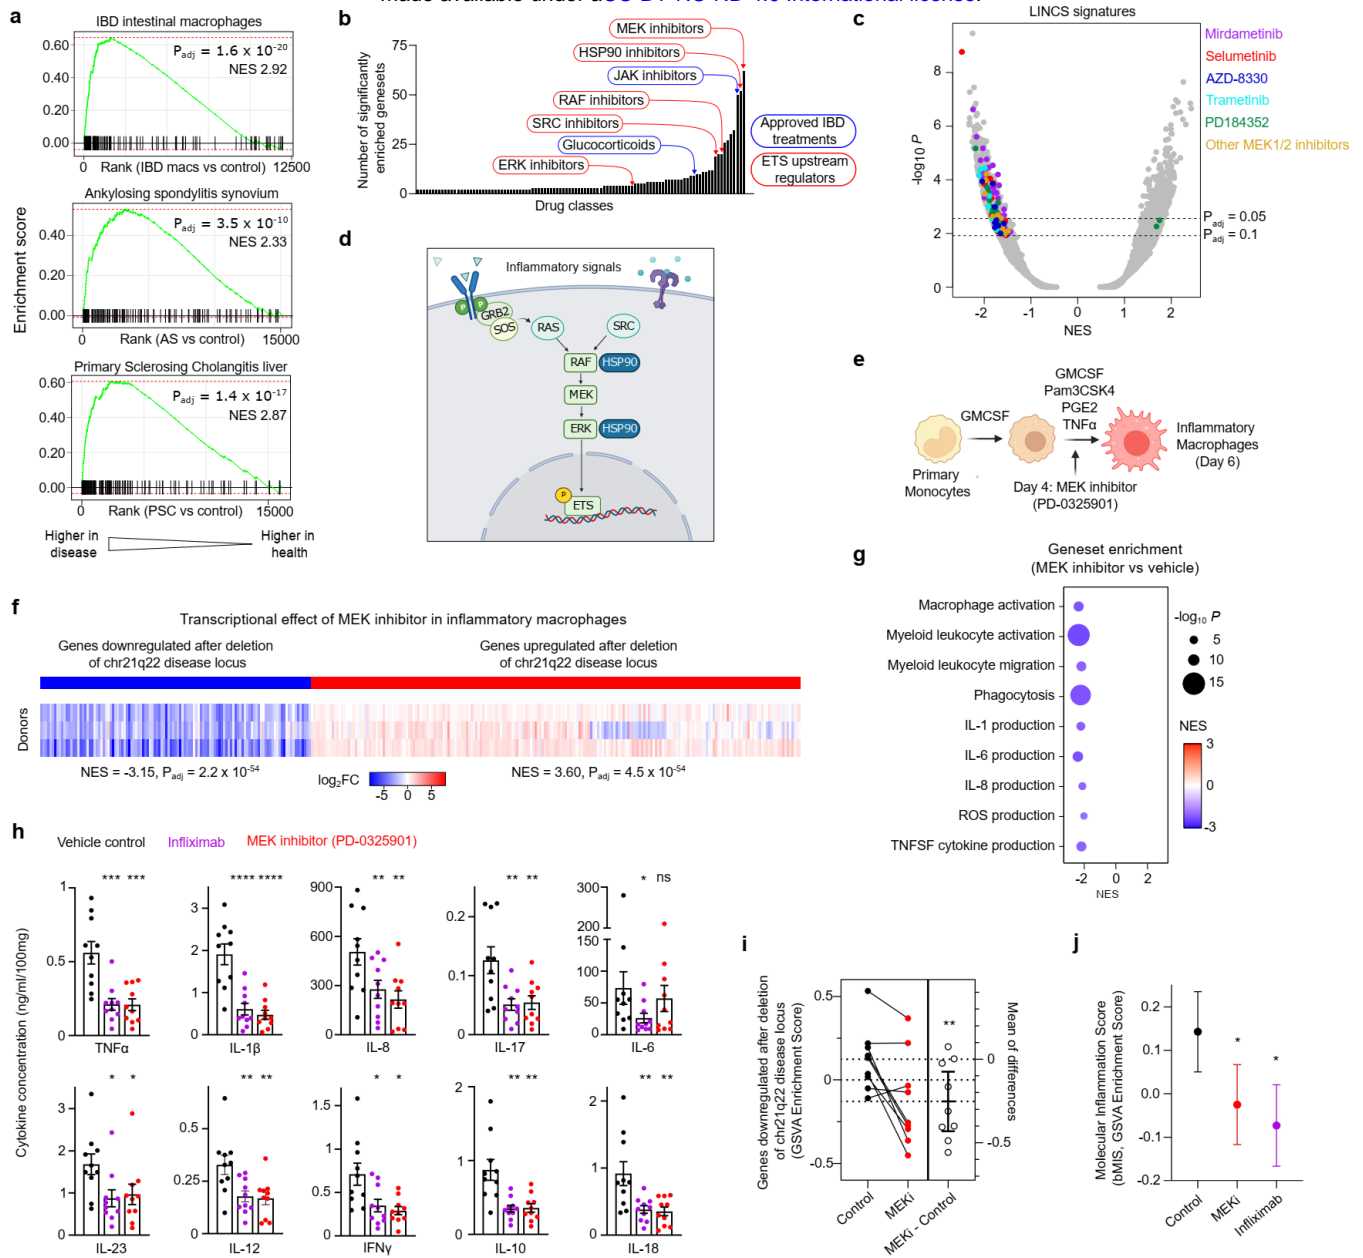

**Figure 5. ETS2-driven inflammation is evident in disease and can be therapeutically targeted.**

**a.** Enrichment of chr21q22-regulated genes in IBD intestinal macrophages (top), AS synovium (middle), and PSC liver (bottom). All relative to unaffected tissue. Gene set comprised significantly downregulated genes following chr21q22 deletion. **b.** Candidate drug classes (from NIH LINC1362 database) that phenocopy the transcriptional consequences of *ETS2* disruption. **c.** fGSEA results for NIH LINC1362 drug signatures (FDR  $P$  estimated using adaptive multi-level split Monte-Carlo scheme; NES, normalised enrichment score). Significantly enriched MEK inhibitor gene sets coloured by molecule. **d.** Schematic of known upstream regulators of *ETS*-family transcription factors. **e.** Schematic of experiment for treating inflammatory macrophages with a MEK inhibitor (PD-0325901). **f.** Heatmap of relative expression ( $\log_2$  fold-change) of chr21q22-regulated genes in inflammatory macrophages following MEK inhibition (compared to vehicle control,  $n=3$ ). **g.** fGSEA of differentially-expressed genes between MEK inhibitor-treated and control inflammatory macrophages. Results shown for Gene Ontology Biological Pathways that were negatively enriched following *ETS2* editing. Dot size represents  $P$ -value and colour denotes NES. **h.** Cytokine secretion from IBD mucosal biopsies cultured for 18 hours with vehicle control, PD-0325901, or infliximab. **i.** Estimation plot of GSEA enrichment scores for chr21q22-downregulated genes in IBD intestinal biopsies following MEK inhibition (MEKi). Error bars indicate 95%CI. **j.** GSEA enrichment scores of a biopsy-derived molecular inflammation score (bMIS). Data in **h** and **i** represent mean $\pm$ SEM. Wilcoxon matched-pairs test, two-tailed,  $n=10$  (**h**),  $n=9$  (**j**). \*  $P < 0.05$ , \*\*  $P < 0.01$ , \*\*\*  $P < 0.001$ , \*\*\*\*  $P < 0.0001$ .

## 222 Discussion

223 Arguably the greatest challenge in modern genetics is to translate the success of GWAS into a  
224 better understanding of human disease. Here, we show how this can provide insights into  
225 basic immunology as well as disease mechanisms, with investigation of a single pleiotropic  
226 risk locus leading to the discovery of a master regulator of human macrophage responses and  
227 a key pathogenic pathway that is potentially druggable. Monocyte-derived macrophages play  
228 an important role in the pathogenesis of many inflammatory diseases<sup>14</sup>, producing cytokines  
229 that are often targeted therapeutically. Blocking individual cytokines, however, is typically only  
230 effective in 30-40% of patients<sup>44</sup> and there is a growing realisation that modulating several  
231 cytokines at once may be a better approach<sup>45</sup>. Modulating ETS2 signalling via MEK1/2  
232 inhibition has a broad effect on multiple inflammatory cytokines, including TNF $\alpha$ , IL-23, and IL-  
233 12 – all targets of existing therapies – and IL-1 $\beta$  which has previously been linked to  
234 treatment-refractory IBD<sup>46</sup> but is not directly modulated by other small molecules (e.g. JAK  
235 inhibitors). However, systemic use of MEK inhibitors may not be an ideal strategy for treating  
236 chronic disease due to the physiological roles of MEK in other tissues. Indeed, use of MEK  
237 inhibitors for other conditions is currently limited by severe ocular, cardiac, and pulmonary  
238 toxicities<sup>47</sup>. Targeting ETS2 directly – for example using PROTACs or molecular glues – or  
239 selectively delivering a MEK inhibitor to inflammatory macrophages via antibody-drug  
240 conjugates could potentially overcome this toxicity, and provide a safer means of inhibiting  
241 ETS2-driven inflammation.

242 These findings emphasise the importance of studying disease mechanisms beyond simple  
243 changes in gene expression, especially since the overlap between the chr21q22 risk  
244 haplotype and a macrophage eQTL had been noted previously<sup>5</sup> without any indication as to  
245 the importance of the downstream biology. Indeed, it is even possible that *ETS2* is involved in  
246 other human pathology, aside from diseases associated with the chr21q22 locus. For  
247 example, Down's syndrome – caused by trisomy of chromosome 21 – was recently proposed  
248 to be a cytokinopathy<sup>48</sup>, with increased basal expression of multiple inflammatory cytokines,



249 including several that are specifically upregulated following *ETS2* overexpression (e.g. IL-1 $\beta$ ,  
250 TNF $\alpha$ , and IL-6). Whether the additional copy of the *ETS2* gene contributes to this phenotype  
251 is unknown, but warrants further study. Relatedly, it is interesting to consider why a  
252 polymorphism that increases susceptibility to multiple inflammatory diseases is so common  
253 (risk allele frequency ~75% in Europeans and >90% in Africans, **Extended Data Fig.9**). One  
254 possibility is that enhanced macrophage effector responses might provide a selective  
255 advantage during infection, which would explain why the ancestral risk allele has not been  
256 negatively selected. Recent studies have not found evidence for a strong selective sweep at  
257 this locus within the past few thousand years<sup>49,50</sup>, but more ancient selection – or balancing  
258 selection maintaining variation – cannot be excluded, especially since rs2836882 appears to  
259 be an exceptionally old SNP (conservatively estimated at >500,000 years old; **Extended Data**  
260 **Fig.9**) and was even polymorphic between Neanderthals and Denisovans (**Extended Data**  
261 **Fig.9**).

262 In summary, using an intergenic GWAS hit as a starting point, we have identified a druggable  
263 pathway that is both necessary and sufficient for human macrophage responses during  
264 chronic inflammation. Furthermore, we show how genetic dysregulation of this pathway – via  
265 perturbation of pioneer factor binding at a critical long-range enhancer – confers susceptibility  
266 to multiple inflammatory diseases. This highlights the considerable, yet largely untapped,  
267 opportunity to better understand disease biology that is presented by non-coding genetic  
268 associations.



## 269 References

- 270 1 Miller, F. W. The increasing prevalence of autoimmunity and autoimmune diseases: an  
271 urgent call to action for improved understanding, diagnosis, treatment, and prevention.  
272 *Curr Opin Immunol* **80**, 102266, doi:10.1016/j.coi.2022.102266 (2023).
- 273 2 Dowden, H. & Munro, J. Trends in clinical success rates and therapeutic focus. *Nat*  
274 *Rev Drug Discov* **18**, 495-496, doi:10.1038/d41573-019-00074-z (2019).
- 275 3 de Lange, K. M. *et al.* Genome-wide association study implicates immune activation of  
276 multiple integrin genes in inflammatory bowel disease. *Nat Genet* **49**, 256-261,  
277 doi:10.1038/ng.3760 (2017).
- 278 4 International Genetics of Ankylosing Spondylitis, C. *et al.* Identification of multiple risk  
279 variants for ankylosing spondylitis through high-density genotyping of immune-related  
280 loci. *Nat Genet* **45**, 730-738, doi:10.1038/ng.2667 (2013).
- 281 5 Ji, S. G. *et al.* Genome-wide association study of primary sclerosing cholangitis  
282 identifies new risk loci and quantifies the genetic relationship with inflammatory bowel  
283 disease. *Nat Genet* **49**, 269-273, doi:10.1038/ng.3745 (2017).
- 284 6 Ortiz-Fernandez, L. *et al.* Identification of susceptibility loci for Takayasu arteritis  
285 through a large multi-ancestral genome-wide association study. *Am J Hum Genet* **108**,  
286 84-99, doi:10.1016/j.ajhg.2020.11.014 (2021).
- 287 7 Martin, J. C. *et al.* Single-Cell Analysis of Crohn's Disease Lesions Identifies a  
288 Pathogenic Cellular Module Associated with Resistance to Anti-TNF Therapy. *Cell*  
289 **178**, 1493-1508 e1420, doi:10.1016/j.cell.2019.08.008 (2019).
- 290 8 Stathias, V. *et al.* LINCS Data Portal 2.0: next generation access point for perturbation-  
291 response signatures. *Nucleic Acids Res* **48**, D431-D439, doi:10.1093/nar/gkz1023  
292 (2020).
- 293 9 Harrison, R. K. Phase II and phase III failures: 2013-2015. *Nat Rev Drug Discov* **15**,  
294 817-818, doi:10.1038/nrd.2016.184 (2016).
- 295 10 Claussnitzer, M. *et al.* A brief history of human disease genetics. *Nature* **577**, 179-189,  
296 doi:10.1038/s41586-019-1879-7 (2020).
- 297 11 King, E. A., Davis, J. W. & Degner, J. F. Are drug targets with genetic support twice as  
298 likely to be approved? Revised estimates of the impact of genetic support for drug  
299 mechanisms on the probability of drug approval. *PLoS Genet* **15**, e1008489,  
300 doi:10.1371/journal.pgen.1008489 (2019).
- 301 12 Hnisz, D. *et al.* Super-enhancers in the control of cell identity and disease. *Cell* **155**,  
302 934-947, doi:S0092-8674(13)01227-0 [pii]  
303 10.1016/j.cell.2013.09.053 (2013).
- 304 13 Kugathasan, S. *et al.* Loci on 20q13 and 21q22 are associated with pediatric-onset  
305 inflammatory bowel disease. *Nat Genet* **40**, 1211-1215, doi:10.1038/ng.203 (2008).
- 306 14 Park, M. D., Silvin, A., Ginhoux, F. & Merad, M. Macrophages in health and disease.  
307 *Cell* **185**, 4259-4279, doi:10.1016/j.cell.2022.10.007 (2022).
- 308 15 Javierre, B. M. *et al.* Lineage-Specific Genome Architecture Links Enhancers and Non-  
309 coding Disease Variants to Target Gene Promoters. *Cell* **167**, 1369-1384 e1319,  
310 doi:10.1016/j.cell.2016.09.037 (2016).
- 311 16 Fairfax, B. P. *et al.* Innate immune activity conditions the effect of regulatory variants  
312 upon monocyte gene expression. *Science* **343**, 1246949, doi:343/6175/1246949 [pii]

- 313 10.1126/science.1246949 (2014).
- 314 17 Xue, J. *et al.* Transcriptome-based network analysis reveals a spectrum model of  
315 human macrophage activation. *Immunity* **40**, 274-288,  
316 doi:10.1016/j.immuni.2014.01.006 (2014).
- 317 18 Kuo, D. *et al.* HBEGF(+) macrophages in rheumatoid arthritis induce fibroblast  
318 invasiveness. *Sci Transl Med* **11**, doi:10.1126/scitranslmed.aau8587 (2019).
- 319 19 Melnikov, A. *et al.* Systematic dissection and optimization of inducible enhancers in  
320 human cells using a massively parallel reporter assay. *Nat Biotechnol* **30**, 271-277,  
321 doi:10.1038/nbt.2137 (2012).
- 322 20 Nerlov, C. & Graf, T. PU.1 induces myeloid lineage commitment in multipotent  
323 hematopoietic progenitors. *Genes Dev* **12**, 2403-2412, doi:10.1101/gad.12.15.2403  
324 (1998).
- 325 21 Heinz, S. *et al.* Simple combinations of lineage-determining transcription factors prime  
326 cis-regulatory elements required for macrophage and B cell identities. *Mol Cell* **38**,  
327 576-589, doi:10.1016/j.molcel.2010.05.004 (2010).
- 328 22 de Santiago, I. *et al.* BaalChIP: Bayesian analysis of allele-specific transcription factor  
329 binding in cancer genomes. *Genome Biol* **18**, 39, doi:10.1186/s13059-017-1165-7  
330 (2017).
- 331 23 Martinez, L. A. Mutant p53 and ETS2, a Tale of Reciprocity. *Front Oncol* **6**, 35,  
332 doi:10.3389/fonc.2016.00035 (2016).
- 333 24 Wei, G. *et al.* Activated Ets2 is required for persistent inflammatory responses in the  
334 motheaten viable model. *J Immunol* **173**, 1374-1379, doi:10.4049/jimmunol.173.2.1374  
335 (2004).
- 336 25 Zhao, J., Huang, K., Peng, H. Z. & Feng, J. F. Protein C-ets-2 epigenetically  
337 suppresses TLRs-induced interleukin 6 production in macrophages. *Biochem Biophys*  
338 *Res Commun* **522**, 960-964, doi:10.1016/j.bbrc.2019.11.123 (2020).
- 339 26 Chung, S. W., Chen, Y. H. & Perrella, M. A. Role of Ets-2 in the regulation of heme  
340 oxygenase-1 by endotoxin. *J Biol Chem* **280**, 4578-4584, doi:10.1074/jbc.M409125200  
341 (2005).
- 342 27 Quinn, S. R. *et al.* The role of Ets2 transcription factor in the induction of microRNA-  
343 155 (miR-155) by lipopolysaccharide and its targeting by interleukin-10. *J Biol Chem*  
344 **289**, 4316-4325, doi:10.1074/jbc.M113.522730 (2014).
- 345 28 Ma, X. *et al.* Ets2 suppresses inflammatory cytokines through MAPK/NF-kappaB  
346 signaling and directly binds to the IL-6 promoter in macrophages. *Aging (Albany NY)*  
347 **11**, 10610-10625, doi:10.18632/aging.102480 (2019).
- 348 29 Aperlo, C., Pognonec, P., Stanley, E. R. & Boulukos, K. E. Constitutive c-ets2  
349 expression in M1D+ myeloblast leukemic cells induces their differentiation to  
350 macrophages. *Mol Cell Biol* **16**, 6851-6858, doi:10.1128/MCB.16.12.6851 (1996).
- 351 30 Henkel, G. W. *et al.* PU.1 but not ets-2 is essential for macrophage development from  
352 embryonic stem cells. *Blood* **88**, 2917-2926 (1996).
- 353 31 Mittal, M., Siddiqui, M. R., Tran, K., Reddy, S. P. & Malik, A. B. Reactive oxygen  
354 species in inflammation and tissue injury. *Antioxid Redox Signal* **20**, 1126-1167,  
355 doi:10.1089/ars.2012.5149 (2014).
- 356 32 Kelly, B. & O'Neill, L. A. Metabolic reprogramming in macrophages and dendritic cells  
357 in innate immunity. *Cell Res* **25**, 771-784, doi:10.1038/cr.2015.68 (2015).

- 358 33 Sazonovs, A. *et al.* Large-scale sequencing identifies multiple genes and rare variants  
359 associated with Crohn's disease susceptibility. *Nat Genet* **54**, 1275-1283,  
360 doi:10.1038/s41588-022-01156-2 (2022).
- 361 34 Slowikowski, K., Hu, X. & Raychaudhuri, S. SNPsea: an algorithm to identify cell types,  
362 tissues and pathways affected by risk loci. *Bioinformatics* **30**, 2496-2497,  
363 doi:10.1093/bioinformatics/btu326 (2014).
- 364 35 Dunham, I. *et al.* An integrated encyclopedia of DNA elements in the human genome.  
365 *Nature* **489**, 57-74, doi:nature11247 [pii]  
366 10.1038/nature11247 (2012).
- 367 36 Cramer, T. *et al.* HIF-1alpha is essential for myeloid cell-mediated inflammation. *Cell*  
368 **112**, 645-657, doi:10.1016/s0092-8674(03)00154-5 (2003).
- 369 37 Tannahill, G. M. *et al.* Succinate is an inflammatory signal that induces IL-1beta  
370 through HIF-1alpha. *Nature* **496**, 238-242, doi:10.1038/nature11986 (2013).
- 371 38 Shiratori, R. *et al.* Glycolytic suppression dramatically changes the intracellular  
372 metabolic profile of multiple cancer cell lines in a mitochondrial metabolism-dependent  
373 manner. *Sci Rep* **9**, 18699, doi:10.1038/s41598-019-55296-3 (2019).
- 374 39 Landt, S. G. *et al.* ChIP-seq guidelines and practices of the ENCODE and  
375 modENCODE consortia. *Genome Res* **22**, 1813-1831, doi:10.1101/gr.136184.111  
376 (2012).
- 377 40 Sevilla, L. *et al.* Bcl-XL expression correlates with primary macrophage differentiation,  
378 activation of functional competence, and survival and results from synergistic  
379 transcriptional activation by Ets2 and PU.1. *J Biol Chem* **276**, 17800-17807,  
380 doi:10.1074/jbc.M008270200 (2001).
- 381 41 Newman, J. A., Cooper, C. D., Aitkenhead, H. & Gileadi, O. Structural insights into the  
382 autoregulation and cooperativity of the human transcription factor Ets-2. *J Biol Chem*  
383 **290**, 8539-8549, doi:10.1074/jbc.M114.619270 (2015).
- 384 42 Koboziev, I., Karlsson, F., Zhang, S. & Grisham, M. B. Pharmacological intervention  
385 studies using mouse models of the inflammatory bowel diseases: translating preclinical  
386 data into new drug therapies. *Inflamm Bowel Dis* **17**, 1229-1245,  
387 doi:10.1002/ibd.21557 (2011).
- 388 43 Argmann, C. *et al.* Biopsy and blood-based molecular biomarker of inflammation in  
389 IBD. *Gut*, doi:10.1136/gutjnl-2021-326451 (2022).
- 390 44 Alsoud, D., Verstockt, B., Fiocchi, C. & Vermeire, S. Breaking the therapeutic ceiling in  
391 drug development in ulcerative colitis. *Lancet Gastroenterol Hepatol* **6**, 589-595,  
392 doi:10.1016/S2468-1253(21)00065-0 (2021).
- 393 45 Feagan, B. G. *et al.* Guselkumab plus golimumab combination therapy versus  
394 guselkumab or golimumab monotherapy in patients with ulcerative colitis (VEGA): a  
395 randomised, double-blind, controlled, phase 2, proof-of-concept trial. *Lancet*  
396 *Gastroenterol Hepatol* **8**, 307-320, doi:10.1016/S2468-1253(22)00427-7 (2023).
- 397 46 Friedrich, M. *et al.* IL-1-driven stromal-neutrophil interactions define a subset of  
398 patients with inflammatory bowel disease that does not respond to therapies. *Nat Med*  
399 **27**, 1970-1981, doi:10.1038/s41591-021-01520-5 (2021).
- 400 47 Klesse, L. J. *et al.* The Use of MEK Inhibitors in Neurofibromatosis Type 1-Associated  
401 Tumors and Management of Toxicities. *Oncologist* **25**, e1109-e1116,  
402 doi:10.1634/theoncologist.2020-0069 (2020).

- 403 48 Malle, L. *et al.* Autoimmunity in Down's syndrome via cytokines, CD4 T cells and  
404 CD11c(+) B cells. *Nature* **615**, 305-314, doi:10.1038/s41586-023-05736-y (2023).
- 405 49 Irving-Pease, E. K. *et al.* The Selection Landscape and Genetic Legacy of Ancient  
406 Eurasians. *bioRxiv*, 2022.2009.2022.509027, doi:10.1101/2022.09.22.509027 (2022).
- 407 50 Le, M. K. *et al.* 1,000 ancient genomes uncover 10,000 years of natural selection in  
408 Europe. *bioRxiv*, 2022.2008.2024.505188, doi:10.1101/2022.08.24.505188 (2022).

## 409 **Methods**

### 410 **Analysis of existing data relating to chr21q22**

411 We used IBD GWAS summary statistics<sup>3</sup> to perform multiple causal variant fine-mapping  
412 using susieR<sup>51</sup> with reference minor allele and LD information calculated from 503 European  
413 samples from 1000 Genomes phase 3. All R analyses used v.4.2.1. Palindromic SNPs (A/T or  
414 C/G) and any SNPs that didn't match by position or alleles were pruned before imputation  
415 using the *ssimp* equations reimplemented in R. This did not affect any candidate SNP at  
416 chr21q22. We obtained SuSiE fine mapping results for *ETS2* (with identifier  
417 ENSG00000157557 or ILMN\_1720158) in monocyte datasets from the eQTL Catalog.  
418 Colocalisation analysis was performed using coloc v5.2.0<sup>52</sup> using a posterior probability of H4  
419 (PP.H4.abf) > 0.5 to call colocalisation.

420 Raw H3K27ac ChIP-seq data from primary human immune cells were downloaded from Gene  
421 Expression Omnibus (GEO series GSE18927 and GSE96014) and processed as described  
422 previously<sup>53</sup>.

423 Processed promoter-capture Hi-C data<sup>15</sup> from 17 primary immune cell-types were downloaded  
424 from OSF (<https://osf.io/u8tzp>).

425

### 426 **Monocyte purification and macrophage differentiation**

427 Leukocyte cones from healthy donors were obtained from NHS Blood and Transplant  
428 (Cambridge Blood Donor Centre, Colindale Blood Centre, or Tooting Blood Donor Centre).  
429 Peripheral blood mononuclear cells (PBMCs) were isolated by density centrifugation  
430 (Histopaque 1077, Sigma) and monocytes were positively selected using CD14 Microbeads  
431 (Miltenyi Biotec). Macrophage differentiation was performed using conditions that model  
432 chronic inflammation (TPP)<sup>17</sup>: 3 days GM-CSF (50ng/ml, Peprotech) followed by 3 days GM-  
433 CSF, TNF $\alpha$  (50ng/ml, Peprotech), PGE<sub>2</sub> (1 $\mu$ g/ml, Sigma Aldrich), and Pam<sub>3</sub>CSK4 (1 $\mu$ g/ml,  
434 Invivogen). All cultures were performed at 37°C, 5% CO<sub>2</sub> in antibiotic-free RPMI1640 media  
435 containing 10% FBS, GlutaMAX, and MEM Non-Essential Amino Acids (all ThermoFisher).  
436 Cells were detached using Accutase (Biolegend).

437

### 438 **Identifying a model of chronic inflammatory macrophages**

439 Human monocyte-derived macrophage gene expression data files (n=299) relating to 64  
440 different polarisation conditions were downloaded from Gene Expression Omnibus  
441 (GSE47189) and quantile normalised. Data from biological replicates were summarised to the  
442 median value for every gene. Gene set variation analysis<sup>54</sup> (using the GSVA package in R)  
443 was performed to identify the polarisation condition that most closely resembled CD14+  
444 monocytes/macrophages from active IBD – using disease-associated lists of differentially-  
445 expressed<sup>55</sup>.

446

### 447 **CRISPR-Cas9 editing of primary human monocytes**

448 gRNA sequences were designed using CRISPick (formerly GPP sgRNA Designer) and  
449 synthesised by IDT. gRNA sequences: chr21q22 5' gRNA, CCUGGCUGCCUCGCGUUUCC;  
450 chr21q22 3' gRNA, CCUCGUCCAACAGAGAGCAA; ETS2 gRNA1,  
451 CAGACACAGAAUUACCCCAA; ETS2 gRNA2, UUGCUGCACGGGGUUAACAA. Alt-R  
452 CRISPR-Cas9 Negative Control crRNA #1 (IDT) was used as a non-targeting control. Cas9-  
453 gRNA ribonucleoproteins were assembled as described previously<sup>53</sup> and nucleofected into  
454  $5 \times 10^6$  monocytes in 100 $\mu$ L nucleofection buffer (Human Monocyte Nucleofection Kit, Lonza)  
455 using a Nucleofector 2b (Lonza, program Y-001). After nucleofection, monocytes were  
456 immediately transferred into 5ml of pre-warmed culture media in a 6-well flat-bottomed plate,  
457 and differentiated into macrophages under TPP conditions. Editing efficiency was quantified  
458 by PCR amplification of the target region in extracted DNA (chr21q22\_Fw primer,  
459 GGTGGGGAGAGTTCCAAAGG; chr21q22\_Rv, TCACCCTTCACCTCTTTGCT;  
460 ETS2\_g1\_Fw, TCCTGAAGGTCCCATGAAAG; ETS2\_g1\_Rv, TCATTATGGCTCTGGGGTTC;  
461 ETS2\_g2\_Fw, GCGGCACATTCATATCACAC; ETS2\_g2\_Rv,  
462 GCAGAATACCCCAAGCAAAA). Editing efficiency at the chr21q22 locus was measured via  
463 quantification of amplified fragments (2100 Bioanalyzer, Agilent) as previously described<sup>53</sup>.



464 Editing efficiency for individual gRNAs was assessed using the Inference of CRISPR Edits  
465 tool<sup>56</sup> (ICE, Synthego).

466

#### 467 **PrimeFlow RNA Assay**

468 RNA abundance was quantified by PrimeFlow (ThermoFisher) in chr21q22-edited and  
469 unedited (NTC) cells on days 0, 3, 4, 5, and 6 of TPP differentiation. Target probes specific for  
470 *ETS2* (Alexa Fluor 647), *BRWD1* (Alexa Fluor 568) and *PSMG1* (Alexa Fluor 568) were used  
471 according to the manufacturer's instructions. Data were analysed using FlowJo v10 (BD  
472 Biosciences).

473

#### 474 **MPRA**

475 Overlapping oligonucleotides containing 114-nt of genomic sequence were designed to tile the  
476 region containing chr21q22 candidate SNPs (99% credible set) at 50bp intervals. Six technical  
477 replicates were designed for every genomic sequence, each tagged by a unique 11-nt  
478 barcode. Additional oligonucleotides were included to test the expression-modulating effect of  
479 every candidate SNP in the 99% credible set. Allelic constructs were designed as described  
480 previously<sup>53</sup> and tagged by 30 unique 11-nt barcodes. Positive and negative controls were  
481 included as described previously<sup>53</sup>. 170-nt oligonucleotides were synthesised as part of a  
482 larger MPRA pool (Twist Biosciences) containing the 16-nt universal primer site  
483 ACTGGCCGCTTCACTG, 114-nt variable genomic sequence, KpnI and XbaI restriction sites  
484 (TGGACCTCTAGA), an 11-nt barcode, and the 17-nt universal primer site  
485 AGATCGGAAGAGCGTTCG. Cloning into the MPRA vector was performed as described  
486 previously<sup>53</sup>. A suitable promoter for the MPRA vector (RSV) was identified by testing  
487 promoter activities in TPP macrophages. The MPRA vector library was nucleofected into TPP  
488 macrophages (5µg vector into 5x10<sup>6</sup> cells) in 100µl nucleofection buffer (Human Macrophage  
489 Nucleofection Kit, Lonza) using a Nucleofector 2b (program Y-011). To ensure adequate  
490 barcode representation, a minimum of 2x10<sup>7</sup> cells were nucleofected for every donor (n=8).  
491 After 24 hours, RNA was extracted and sequencing libraries were made from mRNA or DNA



492 input vector as described previously<sup>53</sup>. Library pools (of 6 samples each) were sequenced on  
493 an Illumina HiSeq2500 high output flow-cell (50bp, single-end reads) and data were pre-  
494 processed as previously described<sup>53</sup>. To identify regions of enhancer activity, a paired t-test  
495 was performed to identify genomic sequences that enhanced transcription. A sliding window  
496 analysis (300-bp window) was then performed across all tiling sequences using the *les*  
497 package in R. Expression-modulating variants were identified using QuASAR-MPRA<sup>57</sup>, as  
498 described previously<sup>53</sup>.

499

#### 500 **BaalChIP**

501 Publicly-available PU.1 ChIP-seq datasets from human macrophages were downloaded from  
502 GEO, and BAM files were examined (using the IGV genome browser) to identify rs2836882  
503 heterozygotes (i.e. files containing both A and G allele reads at chr21:40,466,570; hg19). Two  
504 suitable samples were identified (GSM1681423 and GSM1681429) which were used for a  
505 Bayesian analysis of allelic imbalances in PU.1 binding, with correction for biases introduced  
506 by overdispersion and biases towards the reference allele – implemented in the *BaalChIP*  
507 package<sup>22</sup> in R.

508

#### 509 **Allele-specific PU.1 ChIP-genotyping**

510 A 100ml blood sample was taken from five healthy individuals who were heterozygous at  
511 rs2836882 (assessed via Taqman genotyping, ThermoFisher). All participants provided written  
512 informed consent. Ethical approval was provided by the London - Brent Regional Ethics  
513 Committee (REC: 21/LO/0682). Monocytes were isolated from PBMC using CD14 Microbeads  
514 (Miltenyi Biotec) and differentiated into inflammatory macrophages using TPP conditions<sup>17</sup>.  
515 Following differentiation, macrophages were detached using Accutase and cross-linked for 10  
516 min in fresh media containing 1% formaldehyde. Cross-linking was quenched with glycine for  
517 5 min (final concentration 0.125M). Nuclei preparation and shearing were performed as  
518 described previously<sup>53</sup> with 10 cycles sonication (30s ON/30s OFF, Bioruptor Pico,  
519 Diagenode). PU.1 was immunoprecipitated overnight at 4°C using a polyclonal anti-PU.1

520 antibody (1:25; Cell Signaling) with the SimpleChIP Plus kit (Cell Signaling). The ratio of  
521 rs2836882 alleles in the PU.1-bound DNA was quantified in duplicate by TaqMan genotyping  
522 (assay C\_\_\_2601507\_20). A standard curve was generated using fixed ratios of geneblocks  
523 containing either the risk or non-risk allele (200-nt genomic sequence centred on rs2836882;  
524 Genewiz).

525

### 526 **PU.1 MPRA-ChIP-seq**

527 The MPRA vector library was transfected into TPP macrophages from six healthy donors.  
528 Assessment of PU.1 binding to SNP alleles was performed as described previously<sup>53</sup>, with  
529 minimal sonication (to remove contaminants while minimising chromatin shearing).  
530 Immunoprecipitation was performed overnight at 4°C using a polyclonal anti-PU.1 antibody  
531 (1:25; Cell Signaling) with the SimpleChIP Plus kit (Cell Signaling). Sequencing libraries were  
532 prepared from isolated plasmids as for MPRA and sequencing on a MiSeq (50bp, single-end  
533 reads).

534

### 535 **H3K27ac ChIP-seq**

536 TPP macrophages from two rs2836882 major allele homozygotes and two minor allele  
537 homozygotes were harvested, cross-linked, and quenched as described above. Donors were  
538 identified through the NIHR BioResource. H3K27ac ChIP-seq was performed as described  
539 previously<sup>53</sup> using an anti-H3K27ac antibody (1:250, Abcam) or an isotype control (1:500,  
540 rabbit IgG, Abcam). Libraries were sequenced on a HiSeq4000 (50bp, single-end reads). Raw  
541 data were processed, QC'd, and analysed as described previously<sup>53</sup> (see Code Availability).

542

### 543 **Assays of macrophage effector functions**

#### 544 *Flow cytometry*

545 Expression of myeloid markers was assessed by flow cytometry (BD LSRFortessa™ X-20).  
546 Panel: CD11b PE/Dazzle 594 (BioLegend), CD14 evolve605 (ThermoFisher), CD16 PerCP  
547 (BioLegend), CD68 FITC (BioLegend), Live/Dead Fixable Aqua Dead Cell Stain

548 (ThermoFisher), and Fc Receptor Blocking Reagent (Miltenyi). Data were analysed using  
549 FlowJo v10 (BD Biosciences).

550

#### 551 *Cytokine quantification*

552 Supernatants were collected on day 6 of TPP macrophage culture and frozen. Cytokine  
553 concentrations were quantified in duplicate via electrochemiluminescence using U-PLEX  
554 assays (Meso Scale Diagnostics).

555

#### 556 *Phagocytosis*

557 Phagocytosis was assessed using fluorescently-labelled Zymosan particles (Green Zymosan,  
558 Abcam) according to the manufacturer's instructions. Cells were seeded at  $10^5$  cells/well in  
559 96-well round bottom plates. Cytochalasin D ( $10\mu\text{g/ml}$ , ThermoFisher), an inhibitor of  
560 cytoskeletal rearrangement, was used as a negative control. Phagocytosis was quantified via  
561 flow cytometry, and a phagocytosis index was calculated (proportion of positive cells multiplied  
562 by their mean fluorescence intensity).

563

#### 564 *Extracellular ROS production*

565 Extracellular ROS production was quantified using a Diogenes Enhanced Superoxide  
566 Detection Kit (National Diagnostics) according to the manufacturer's protocol. Cells were  
567 seeded at a density of  $10^5$  cells/well and pre-stimulated with PMA ( $200\text{ng/ml}$ , Sigma Aldrich).

568

#### 569 *Western blotting*

570 Western blotting was performed as described previously<sup>58</sup> using the following primary  
571 antibodies: rabbit anti-gp91 $\text{phox}$ , rabbit anti-p22 $\text{phox}$  (both Santa Cruz), rabbit anti-  
572 C17ORF62/EROS (Atlas), rabbit anti-actin (Abcam). Secondary antibody was anti-rabbit IgG-  
573 horseradish peroxidase (Cell Signaling). Chemiluminescence was recorded on a ChemiDoc  
574 Touch imager (Bio-Rad) following incubation of the membrane with ECL (ThermoFisher) or  
575 SuperSignal West Pico PLUS (ThermoFisher) reagent.

576

## 577 **RNA sequencing**

578 RNA was isolated from macrophage lysates (AllPrep DNA/RNA Micro Kit, Qiagen) and  
579 sequencing libraries prepared from 10ng RNA using the SMARTer Stranded Total RNA-Seq  
580 Kit v2 - Pico Input Mammalian (Takara) following the manufacturer's instructions. Libraries  
581 were sequenced on a NextSeq2000 (50bp, PE reads: CRISPR-based loss-of-function,  
582 roxadustat and PD-0325901 experiments) or a NovaSeq6000 (100bp, PE reads:  
583 overexpression experiments). Reads were trimmed using Trim Galore (Phred score 24),  
584 filtered to remove reads < 20bp, and ribosomal reads were removed using the BBSplit  
585 function of BBDMap (BBDMap, [sourceforge.net/projects/bbmap/](https://sourceforge.net/projects/bbmap/)) with the Human ribosomal DNA  
586 complete repeating unit (GenBank: U13369.1). Reads were aligned to the human genome  
587 (hg38) using HISAT2 (ref.<sup>59</sup>) and converted to BAM files, sorted and indexed using  
588 SAMtools<sup>60</sup>. Gene read counts were obtained with the featureCounts program<sup>61</sup> from  
589 Rsubread using the GTF annotation file for human genome build GRCh38 (version 102).  
590 Differential expression analysis was performed in R using the *limma* package<sup>62</sup> with the voom  
591 transformation and including donor as a covariate.

592

## 593 **Gene set enrichment analysis**

594 GSEA was performed using the *fgsea*<sup>63</sup> package in R. Gene sets were either obtained from  
595 Gene Ontology Biological Pathways (downloaded from MSigDB), experimentally-derived  
596 based on differential expression analysis, or sourced from published literature<sup>7</sup>. Pathways  
597 shown in Figures 2-5 are: GO:0002274, GO:0042116, GO:0097529, GO:0006909,  
598 GO:0071706, GO:0032732, GO:0032755, GO:0032757, GO:2000379, GO:0009060,  
599 GO:0006119, and GO:0045649. Statistical significance was calculated using the adaptive  
600 multilevel split Monte Carlo method.

601

## 602 ***In vitro* transcription**

603 The cDNA sequence for *ETS2* (NM005329.5) preceded by a Kozak sequence was  
604 synthesised and cloned into a TOPO vector. This was linearised and a PCR amplicon of the  
605 *ETS2* gene generated, adding a T7 promoter and an AG initiation sequence (Phusion, NEB):  
606 Fw primer: GCTAATACGACTCACTATAAGGACAGGCCACCATGAATGATTTTCGGAATC, Rv  
607 primer: TCAGTCCTCCGTGTCGG). A reverse complement (control) amplicon was also  
608 generated: Fw primer:  
609 GCTAATACGACTCACTATAAGGACAGGCCACCTCAGTCCTCCGTGTCGG, Rv primer:  
610 GCCACCATGAATGATTTTCGGAATC). These amplicons were used as templates for *in vitro*  
611 transcription using the HiScribe T7 mRNA Kit with CleanCap® Reagent AG kit (NEB)  
612 according to the manufacturer's instructions, but with substitution of N1-methyl-pseudouridine  
613 for uridine and methylcytidine for cytidine (both Stratech) to minimise non-specific cellular  
614 activation by the transfected mRNA. mRNA was purified using a MEGAclean Transcription  
615 Clean-Up Kit (ThermoFisher) and polyadenylated using an *E. coli* Poly(A) Polymerase (NEB)  
616 before further clean-up (MEGAclean), quantification and analysis of product size  
617 (NorthernMax®-Gly gel, ThermoFisher). For optimising overexpression conditions, GFP  
618 mRNA was produced using the same method: Fw primer  
619 GCTAATACGACTCACTATAAGGACAGGCCACCATGGTGAGCAAGGGCGAG, Rv primer  
620 TTAATTGTACAGCTCGTCCATGC).

621

## 622 **mRNA overexpression.**

623 Lipofectamine MessengerMAX (ThermoFisher) was diluted in Opti-MEM (1:75 v/v), vortexed  
624 and incubated at room temperature for 10 minutes. IVT mRNA was then diluted in a fixed  
625 volume of Opti-MEM (112.5µl per transfection), mixed with an equal volume of diluted  
626 Lipofectamine MessengerMAX and incubated for a further 5 minutes at room temperature.  
627 The transfection mix was then added dropwise to  $2.5 \times 10^6$  M0 macrophages (pre-cultured for 6  
628 days in a 6-well plate in antibiotic-free RPMI1640 macrophage media containing M-CSF  
629 (50ng/ml, Peprotech) – with media change on d3). For GFP overexpression, cells were  
630 detached using Accutase 18 hours after transfection and GFP expression was measured by

631 flow cytometry. For *ETS2* / control overexpression, either 250ng or 500ng mRNA was  
632 transfected and low dose LPS (0.5ng/ml) was added 18 hours after transfection, and cells  
633 detached using Accutase 6 hours later (n=8 donors). Representative *ETS2* expression in  
634 untransfected macrophages obtained from previous data (GSE193336).

635

### 636 **SNPsea**

637 Pathway analysis of 241 IBD-associated GWAS hits<sup>3</sup> was performed using SNPsea<sup>34</sup>. In brief,  
638 linkage intervals were defined for every lead SNP based on the furthest correlated SNPs ( $r^2 >$   
639 0.5 in 1000 Genomes, EUR population) and extended to the nearest recombination hotspots  
640 with recombination rate  $>3$  cM/Mb. If no genes were present in this region, the linkage interval  
641 was extended up- and down-stream by 500kb. Genes within linkage intervals were tested for  
642 enrichment within 7,660 pathways, comprising 7,658 Gene Ontology Biological Pathways and  
643 2 lists of *ETS2*-regulated genes (either those significantly downregulated following *ETS2*  
644 disruption with gRNA1 or those significantly upregulated following *ETS2* overexpression,  
645 based on a consensus list obtained from differential expression analysis including all samples  
646 and using donor and mRNA quantity as covariates). The analysis was performed using a  
647 single score mode: assuming that only one gene per linkage interval is associated with the  
648 pathway. A null distribution of scores for each pathway was performed by sampling random  
649 SNP sets matched on the number of linked genes (5,000,000 iterations). A permutation *P*-  
650 value was calculated by comparing the enrichment of the IBD-associated gene list with the  
651 null distribution. Gene sets relating to the following IBD-associated pathways were extracted  
652 for comparison: NOD2 signalling (GO:0032495), Integrin signalling (GO:0033627,  
653 GO:0033622), TNF $\alpha$  signalling (GO:0033209, GO:0034612), Intestinal epithelium  
654 (GO:0060729, GO:0030277), Th17 cells (GO:0072539, GO:0072538, GO:2000318), T cell  
655 activation (GO:0046631, GO:0002827), IL-10 signalling (GO:0032613, GO:0032733), and  
656 autophagy (GO:0061919, GO:0010506, GO:0010508, GO:1905037, GO:0010507).

657

### 658 **ETS2 co-expression**

659 Genes co-expressed with ETS2 across 64 human monocyte-derived macrophage polarisation  
660 conditions (normalised data from GSE47189) were identified using the rcorr function in the  
661 *Hmisc* package in R.

662

### 663 **<sup>13</sup>C-glucose GC-MS**

664 *ETS2*-edited or unedited TPP macrophages were generated in triplicate for each donor and  
665 on day 6, media was removed, cells washed with PBS, and new media with labelled glucose  
666 was added. Labelled media: RPMI1640 Medium, no glucose (ThermoFisher); 10% FBS  
667 (ThermoFisher); GlutaMAX (ThermoFisher); <sup>13</sup>C-labelled glucose (Cambridge Isotope  
668 Laboratories). After 24 hours – a time point selected from a time-course to establish steady-  
669 state conditions – supernatants were snap-frozen and macrophages detached by scraping.  
670 Macrophages were washed three times with ice-cold PBS, counted, re-suspended in 600µl  
671 ice-cold chloroform:methanol (2:1, v/v) and sonicated in a waterbath (3 x 8 mins). All  
672 extraction steps were performed at 4°C as previously described<sup>64</sup>. Samples were analysed in  
673 an Agilent 7890B-7000C GC–MS system. Spitless injection (injection temperature 270°C)  
674 onto a DB-5MS (Agilent) was used, using helium as the carrier gas, in electron ionization  
675 mode. The initial oven temperature was 70°C (2 min), followed by temperature gradients to  
676 295 °C at 12.5 °C per min and to 320 °C at 25 °C per min (held for 3 min). Scan range was m/z  
677 50-550. Data analysis was performed using in-house software MANIC (version 3.0), based on  
678 the software package GAVIN<sup>65</sup>. Label incorporation was calculated by subtracting the natural  
679 abundance of stable isotopes from the observed amounts. Total metabolite abundance was  
680 normalised to the internal standard (scyllo-inositol<sup>64</sup>).

681

### 682 **Roxadustat**

683 *ETS2*-edited or unedited TPP macrophages were generated as described previously. On day  
684 5 of culture, cells were detached (Accutase) and re-plated at a density of 10<sup>5</sup> cells/well in 96-  
685 well round bottom plates in TPP media containing Roxadustat (FG-4592, 30µM). After 12  
686 hours, cells were harvested for functional assays and RNA-seq as described.



687

## 688 **CUT&RUN**

689 Pre-cultured TPP macrophages were harvested and processed immediately using the  
690 CUT&RUN Assay kit (Cell Signaling) according to the manufacturer's instructions but omitting  
691 the use of ConA-coated beads. In brief,  $5 \times 10^5$  cells per reaction were pelleted, washed, and  
692 resuspended in Antibody Binding buffer. Cells were incubated with antibodies: anti-ETS2  
693 (1:100, ThermoFisher) or IgG control (1:20, Cell Signaling) for 2h at 4°C. After washing in  
694 Digitonin Buffer, cells were incubated with pA/G-MNase for 1h at 4°C. Cells were washed  
695 twice in Digitonin Buffer, resuspended in the same buffer and cooled for 5 minutes on ice.  
696 Calcium chloride was added to activate pA/G-MNase digestion (30 min, 4°C) before the  
697 reaction was stopped and cells incubated at 37°C for 10 min to release cleaved chromatin  
698 fragments. Supernatants were collected by centrifugation and DNA extracted using spin  
699 columns (Cell Signaling). Library preparation was performed using a protocols.IO protocol  
700 ([dx.doi.org/10.17504/protocols.io.bagaibse](https://dx.doi.org/10.17504/protocols.io.bagaibse)) with the NEBNext Ultra II DNA Library Prep Kit.  
701 Size selection was performed using AMPure XP beads (Beckman Coulter) and fragment sizes  
702 assessed using an Agilent 2100 Bioanalyzer (High Sensitivity DNA kit). Equimolar pools of  
703 indexed libraries were sequenced on a NovaSeq6000 (100bp PE reads). Raw data were  
704 analysed using guidelines from the Henikoff lab<sup>66</sup>. Briefly, paired-end reads were trimmed  
705 using Trim Galore and aligned to the human genome (GRCh37/hg19) using Bowtie2. BAM  
706 files were sorted, merged (technical and, where indicated, biological replicates), re-sorted and  
707 indexed using SAMtools. Picard was used to mark unmapped reads and SAMtools to remove  
708 these reads, re-sort and re-index. Bigwig files were created using the deepTools  
709 bamCoverage function. Processed data were initially analysed using the nf-core CUT&RUN  
710 pipeline v3.0, using CPM normalisation and default MACS2 parameters for peak calling. This  
711 analysis yielded acceptable quality metrics (including an average FRiP score of 0.23) but  
712 there were a high number of peaks with low fold enrichment (<4) over control. We therefore  
713 applied more stringent parameters for peak calling (--qvalue 0.05 -f BAMPE --keep-dup all -B -  
714 -nomodel) and applied an irreproducible discovery rate (IDR; cut-off 0.001) to identify

715 consistent peaks between replicates – implemented in the *idr* package in R (code:  
716 [https://github.com/JamesLeeLab/chr21q22\\_manuscript/CUT&RUN/CUTRUN\\_pipeline.sh](https://github.com/JamesLeeLab/chr21q22_manuscript/CUT&RUN/CUTRUN_pipeline.sh)).  
717 Enrichment of an ETS2 binding motif in consensus IDR peaks was calculated using  
718 TFmotifView<sup>67</sup> using global genomic controls. Overlap between consensus IDR peaks and the  
719 core promoter (-250bp to +35bp from TSS) and/or putative cis-regulatory elements of ETS2-  
720 regulated genes was assessed using lists of differentially-expressed genes following *ETS2*  
721 disruption with gRNA1 or *ETS2* overexpression (based on a consensus across mRNA doses,  
722 as described earlier). Putative cis-regulatory elements were defined as shared interactions  
723 (CHiCAGO score > 5) in monocyte, M0 and M1 macrophage samples from publicly-available  
724 promoter-capture Hi-C data<sup>15</sup>.

725

## 726 **ATAC-seq**

727 ATAC-seq in TPP macrophages was performed using the Omni-ATAC protocol<sup>68</sup> with the  
728 following modifications: cell number was increased to 75,000 cells, cell lysis time was  
729 increased to 5 minutes; volume of Tn5 transposase in the transposition mixture was doubled;  
730 duration of the transposition step was extended to 40 minutes. Amplified libraries were  
731 cleaned using AMPure XP beads (Beckman Coulter) and sequenced on a NovaSeq6000  
732 (100bp PE reads). Data were processed as described previously<sup>69</sup>.

733

## 734 **Chr21q22 disease datasets**

735 Publicly-available raw RNA-seq data from the affected tissues of chr21q22-associated  
736 diseases (and controls from the same experiment) were downloaded from GEO: IBD  
737 macrophages (GSE123141), primary sclerosing cholangitis liver (GSE159676), ankylosing  
738 spondylitis synovium (GSE41038). Reads were trimmed, filtered, and aligned as described  
739 earlier. For each disease dataset, a ranked list of genes was obtained by differential  
740 expression analysis between cases and controls using *limma* with voom transformation. For  
741 IBD macrophages, only IBD samples with active disease were included. fGSEA using ETS2-  
742 regulated gene lists was performed as described.

743

#### 744 **LINCS signatures**

745 31,027 lists of down-regulated genes following exposure of a cell line to a small molecule  
746 were obtained from the NIH LINCS database<sup>8</sup> (downloaded in January 2021). These were  
747 used as gene sets for fGSEA (as described) with a ranked list of genes obtained by differential  
748 expression analysis between *ETS2*-edited and unedited TPP macrophages (gRNA1) – using  
749 *limma* with voom transformation and donor as a covariate. Drug classes for gene sets with  
750 FDR  $P < 0.05$  were manually assigned based on known mechanisms of action.

751

#### 752 **PD-0325901**

753 TPP macrophages were generated as described previously. On day 4 of culture, PD-0325901  
754 (0.5 $\mu$ M, Sigma) or vehicle (DMSO) were added. Cells were harvested on day 6 and RNA was  
755 extracted and sequenced as described.

756

#### 757 **Colonic biopsies**

758 During colonoscopy, intestinal mucosal biopsies (6 per donor) were collected from 10 IBD  
759 patients (7 ulcerative colitis, 3 Crohn's disease). All had endoscopically active disease and  
760 were not receiving immunosuppressive or biologic therapies. All biopsies were collected from  
761 a single inflamed site. All patients provided written informed consent. Ethical approval was  
762 provided by the London - Brent Regional Ethics Committee (REC: 21/LO/0682). Biopsies were  
763 collected into Opti-MEM and within 1 hour were weighed and placed in pairs onto a transwell  
764 insert (ThermoFisher) – designed to create an air-liquid interface<sup>70</sup> – in a 24-well plate. Each  
765 well contained 1ml media and was supplemented with either DMSO (vehicle control), PD-  
766 0325901 (0.5 $\mu$ M) or infliximab (10 $\mu$ g/ml; MSD). Media: Opti-MEM I (Gibco); GlutaMAX  
767 (ThermoFisher); 10% FBS (ThermoFisher); MEM Non-Essential Amino Acids (ThermoFisher);  
768 1% sodium pyruvate (ThermoFisher); 1% penicillin/streptomycin (ThermoFisher); 50 $\mu$ g/ml  
769 gentamicin (Merck). After 18 hours, supernatants and biopsies were snap frozen. Supernatant  
770 cytokine concentrations were quantified using LEGENDplex Human Inflammation Panel

771 (Biolegend). RNA was extracted from biopsies and libraries prepared as described earlier  
772 (n=9, RNA from one donor was too degraded). Sequencing was performed on a NovaSeq  
773 6000 (100bp, PE reads). Data were processed as described earlier and GSVA was performed  
774 for ETS2-regulated genes and biopsy-derived signatures of IBD-associated inflammation<sup>43</sup>.

775

### 776 **Chr21q22 genotypes in archaic humans**

777 Using publicly available genomes from seven Neanderthal individuals<sup>71-74</sup>, one Denisovan  
778 individual<sup>75</sup>, and one Neanderthal and Denisovan F1 individual<sup>76</sup>, we called genotypes at the  
779 disease-associated chr21q22 candidate SNPs from the respective BAM files using “bcftools  
780 mpileup” with base and mapping quality options -q 20 -Q 20 -C 50 and using “bcftools call -m -  
781 C alleles”, specifying the two alleles expected at each site in a targets file (-T option). From the  
782 resulting vcf file, we extracted the number of reads supporting the reference and alternative  
783 alleles stored in the “DP4” field.

784

### 785 **Inference of Relate genealogy at rs2836882**

786 We used genome-wide genealogies previously inferred for samples of the Simons Genome  
787 Diversity Project<sup>77</sup> dataset (<https://reichdata.hms.harvard.edu/pub/datasets/sgdp/>) using  
788 Relate<sup>78,79</sup>. These genealogies were downloaded from  
789 <https://www.dropbox.com/sh/2gjyxe3kqzh932o/AAAQcipCHnySqEB873t9EQjNa?dl=0>. Using  
790 the inferred genealogies, the genealogy at rs2836882 (chr21:40466570) was plotted using the  
791 TreeView module of Relate.

792

### 793 **Statistical methodology**

794 Statistical methods used in MPRA analysis, fGSEA, and SNPsea are described above. For  
795 other analyses, comparison of continuous variables between paired samples in two groups  
796 was performed using a Wilcoxon matched-pairs test for non-parametric data or a paired t-test  
797 for parametric data. Comparison against a hypothetical value was performed using a Wilcoxon  
798 signed-rank test for non-parametric data or one sample t-test for parametric data. A Shapiro-

799 Wilk test was used to confirm normality. Two-tailed tests were used as standard unless a  
800 specific hypothesis was being tested. Sample sizes are provided in respective sections.

801

#### 802 **Code availability**

803 Code to reproduce analyses are available at

804 [https://github.com/JamesLeeLab/chr21q22\\_manuscript](https://github.com/JamesLeeLab/chr21q22_manuscript) and

805 <https://github.com/chr1swallace/ibd-ets2-analysis>.

806

#### 807 **Data availability**

808 The datasets produced in this study, including raw and processed files, have been uploaded  
809 to the following databases and will be made publicly available in advance of publication.

810 Gene Expression Omnibus: MPRA (GSE229472), RNA-seq of *ETS2* or chr21q22-edited TPP

811 macrophages (GSE229569), RNA-seq of *ETS2* overexpression (GSE229744), RNA-seq of

812 MEK inhibitor-treated TPP macrophages (GSE229743), H3K27ac ChIP-seq in TPP

813 macrophages (GSE229464), ATAC-seq in TPP macrophages (GSE229624), *ETS2*

814 CUT&RUN (GSE229745), biopsy RNA-seq data (GSE230020).

815 MetaboLights: Metabolomics (MTBLS7665).

## 816 **Methods references**

- 817 51 Zou, Y., Carbonetto, P., Wang, G. & Stephens, M. Fine-mapping from summary data  
818 with the "Sum of Single Effects" model. *PLoS Genet* **18**, e1010299,  
819 doi:10.1371/journal.pgen.1010299 (2022).
- 820 52 Wallace, C. A more accurate method for colocalisation analysis allowing for multiple  
821 causal variants. *PLoS Genet* **17**, e1009440, doi:10.1371/journal.pgen.1009440 (2021).
- 822 53 Bourges, C. *et al.* Resolving mechanisms of immune-mediated disease in primary CD4  
823 T cells. *EMBO Mol Med* **12**, e12112, doi:10.15252/emmm.202012112 (2020).
- 824 54 Hanzelmann, S., Castelo, R. & Guinney, J. GSEA: gene set variation analysis for  
825 microarray and RNA-seq data. *BMC Bioinformatics* **14**, 7, doi:10.1186/1471-2105-14-7  
826 (2013).
- 827 55 Peters, J. E. *et al.* Insight into Genotype-Phenotype Associations through eQTL  
828 Mapping in Multiple Cell Types in Health and Immune-Mediated Disease. *PLoS Genet*  
829 **12**, e1005908, doi:10.1371/journal.pgen.1005908 (2016).
- 830 56 Conant, D. *et al.* Inference of CRISPR Edits from Sanger Trace Data. *CRISPR J* **5**,  
831 123-130, doi:10.1089/crispr.2021.0113 (2022).
- 832 57 Kalita, C. A. *et al.* QuASAR-MPRA: accurate allele-specific analysis for massively  
833 parallel reporter assays. *Bioinformatics* **34**, 787-794, doi:10.1093/bioinformatics/btx598  
834 (2018).
- 835 58 Randzavola, L. O. *et al.* EROS is a selective chaperone regulating the phagocyte  
836 NADPH oxidase and purinergic signalling. *Elife* **11**, doi:10.7554/eLife.76387 (2022).
- 837 59 Kim, D., Paggi, J. M., Park, C., Bennett, C. & Salzberg, S. L. Graph-based genome  
838 alignment and genotyping with HISAT2 and HISAT-genotype. *Nat Biotechnol* **37**, 907-  
839 915, doi:10.1038/s41587-019-0201-4 (2019).
- 840 60 Li, H. *et al.* The Sequence Alignment/Map format and SAMtools. *Bioinformatics* **25**,  
841 2078-2079, doi:10.1093/bioinformatics/btp352 (2009).
- 842 61 Liao, Y., Smyth, G. K. & Shi, W. featureCounts: an efficient general purpose program  
843 for assigning sequence reads to genomic features. *Bioinformatics* **30**, 923-930,  
844 doi:10.1093/bioinformatics/btt656 (2014).
- 845 62 Ritchie, M. E. *et al.* limma powers differential expression analyses for RNA-sequencing  
846 and microarray studies. *Nucleic Acids Res* **43**, e47, doi:10.1093/nar/gkv007 (2015).
- 847 63 Korotkevich, G. *et al.* Fast gene set enrichment analysis. *bioRxiv*, 060012,  
848 doi:10.1101/060012 (2021).
- 849 64 Bussi, C. *et al.* Lysosomal damage drives mitochondrial proteome remodelling and  
850 reprograms macrophage immunometabolism. *Nat Commun* **13**, 7338,  
851 doi:10.1038/s41467-022-34632-8 (2022).
- 852 65 Behrends, V., Tredwell, G. D. & Bundy, J. G. A software complement to AMDIS for  
853 processing GC-MS metabolomic data. *Anal Biochem* **415**, 206-208,  
854 doi:10.1016/j.ab.2011.04.009 (2011).
- 855 66 Meers, M. P., Bryson, T. D., Henikoff, J. G. & Henikoff, S. Improved CUT&RUN  
856 chromatin profiling tools. *Elife* **8**, doi:10.7554/eLife.46314 (2019).
- 857 67 Leporcq, C. *et al.* TFmotifView: a webserver for the visualization of transcription factor  
858 motifs in genomic regions. *Nucleic Acids Res* **48**, W208-W217,  
859 doi:10.1093/nar/gkaa252 (2020).



- 860 68 Corces, M. R. *et al.* An improved ATAC-seq protocol reduces background and enables  
861 interrogation of frozen tissues. *Nat Methods* **14**, 959-962, doi:10.1038/nmeth.4396  
862 (2017).
- 863 69 Calderon, D. *et al.* Landscape of stimulation-responsive chromatin across diverse  
864 human immune cells. *Nat Genet* **51**, 1494-1505, doi:10.1038/s41588-019-0505-9  
865 (2019).
- 866 70 Vadstrup, K. *et al.* Validation and Optimization of an Ex Vivo Assay of Intestinal  
867 Mucosal Biopsies in Crohn's Disease: Reflects Inflammation and Drug Effects. *PLoS*  
868 *One* **11**, e0155335, doi:10.1371/journal.pone.0155335 (2016).
- 869 71 Prufer, K. *et al.* The complete genome sequence of a Neanderthal from the Altai  
870 Mountains. *Nature* **505**, 43-49, doi:10.1038/nature12886 (2014).
- 871 72 Prufer, K. *et al.* A high-coverage Neandertal genome from Vindija Cave in Croatia.  
872 *Science* **358**, 655-658, doi:10.1126/science.aao1887 (2017).
- 873 73 Hajdinjak, M. *et al.* Reconstructing the genetic history of late Neanderthals. *Nature*  
874 **555**, 652-656, doi:10.1038/nature26151 (2018).
- 875 74 Mafessoni, F. *et al.* A high-coverage Neandertal genome from Chagyrskaya Cave.  
876 *Proc Natl Acad Sci U S A* **117**, 15132-15136, doi:10.1073/pnas.2004944117 (2020).
- 877 75 Meyer, M. *et al.* A high-coverage genome sequence from an archaic Denisovan  
878 individual. *Science* **338**, 222-226, doi:10.1126/science.1224344 (2012).
- 879 76 Slon, V. *et al.* The genome of the offspring of a Neanderthal mother and a Denisovan  
880 father. *Nature* **561**, 113-116, doi:10.1038/s41586-018-0455-x (2018).
- 881 77 Mallick, S. *et al.* The Simons Genome Diversity Project: 300 genomes from 142  
882 diverse populations. *Nature* **538**, 201-206, doi:10.1038/nature18964 (2016).
- 883 78 Speidel, L., Forest, M., Shi, S. & Myers, S. R. A method for genome-wide genealogy  
884 estimation for thousands of samples. *Nat Genet* **51**, 1321-1329, doi:10.1038/s41588-  
885 019-0484-x (2019).
- 886 79 Speidel, L. *et al.* Inferring Population Histories for Ancient Genomes Using Genome-  
887 Wide Genealogies. *Mol Biol Evol* **38**, 3497-3511, doi:10.1093/molbev/msab174 (2021).

888 **Acknowledgements**

889 We thank members of the Lee lab and Arthur Kaser for helpful discussions and Gitta  
890 Stockinger, Carola Vinuesa, Charlie Swanton, Rickie Patani, and Caetano Reis e Sousa for  
891 critical reading of the manuscript. We thank Chris Cheshire, the Francis Crick Institute  
892 Advanced Sequencing Facility and Flow Cytometry STP for technical support, Laura Lucaciu  
893 for help with patient recruitment, and Sarah Edwards for providing infliximab. We thank NIHR  
894 BioResource volunteers for their participation, and acknowledge NIHR BioResource centres,  
895 NHS Blood and Transplant, and NHS staff for their contribution. This work was supported by  
896 Crohn's and Colitis UK (M2018-3), the Wellcome Trust (Sir Henry Wellcome Fellowship to  
897 L.S.: 220457/Z/20/Z, Investigator Award to P.S.: 217223/Z/19/Z, Senior Fellowship to C.W.:  
898 WT220788, Clinical Research Career Development Fellowship to M.Z.C.: 222056/Z/20/Z,  
899 Wellcome-Beit Prize Clinical Career Development Fellowship to D.C.T.: 206617/A/17/A, and  
900 Intermediate Clinical Fellowship to J.C.L.: 105920/Z/14/Z), and the Francis Crick Institute,  
901 which receives its core funding from Cancer Research UK (CC2219, FC001595), the UK  
902 Medical Research Council (CC2219, FC001595), and the Wellcome Trust (CC2219,  
903 FC001595). P.S. is additionally supported by the European Molecular Biology Organisation,  
904 the Vallee Foundation, and the European Research Council (852558). C.W. is additionally  
905 supported by the Medical Research Council (MC UU 00002/4), GSK, MSD, and the NIHR  
906 Cambridge BRC (BRC-1215-20014). D.C.T. is additionally supported by the Sidharth Burman  
907 endowment, and J.C.L. is a Lister Institute Prize Fellow. The funders had no role in study  
908 design, data collection and analysis, decision to publish, or preparation of the manuscript.  
909 Experimental schematics in Figs. 1b, 2a, 3a, 5e created using BioRender. For the purpose of  
910 Open Access, the authors have applied a CC BY public copyright licence to any Author  
911 Accepted Manuscript version arising from this submission.

912

913 **Author contributions**

914 Conceptualisation, J.I.M., P.S., M.Z.C., C.W., D.C.T., J.C.L.; Methodology, C.T.S., C.B.,  
915 M.S.D.S., L.O.R., L.S., J.I.M., C.W., J.C.L.; Software, C.B., M.S.D.S., L.S., J.I.M., C.W.;

916 Investigation, C.T.S., C.B., T.T.S., A.P.P., C.P.J., I.P., M.S.D.S., L.O.R., L.S., E.C.P., W.E.,  
917 A.P.R., C.D.M., C.W, J.C.L.; Resources, C.T.S., C.B., M.S.D.S., J.C.L.; Formal analysis,  
918 C.T.S., C.B., M.S.D.S., L.S., C.W., J.C.L.; Writing – Original Draft, C.T.S., C.B., J.C.L.; Writing  
919 – Review & Editing, all authors; Funding Acquisition, J.C.L.; Supervision, J.I.M., P.S., C.W.,  
920 D.C.T., J.C.L.

921

## 922 **Competing Interests**

923 C.T.S., C.B. and J.C.L. are co-inventors on a patent application relating to this work. C.W.  
924 holds a part time position at GSK. GSK had no role in this study.

925

## 926 **Additional information**

927 **Supplementary information:** results of differential expression analysis in *ETS2*-edited or  
928 *ETS2* overexpression experiments are available in Supplementary Tables 1 and 2.

929 **Correspondence and requests for materials** should be addressed to James C. Lee.
